# Supplementary material for: Clinician and patient perspectives on the barriers and facilitators to physical rehabilitation in intensive care: a qualitative interview study
Source: PubMed Central journal article supplement (PMC10632869; doi:10.1136/bmjopen-2023-073061), 2023-11-08
Supplement: bmjopen-2023-073061.draft_revisions.pdf [file bmjopen-2023-073061.draft_revisions.pdf]

# BMJ Open

BMJ Open is committed to open peer review. As part of this commitment we make the peer review history of every article we publish publicly available.

When an article is published we post the peer reviewers' comments and the authors' responses online. We also post the versions of the paper that were used during peer review. These are the versions that the peer review comments apply to.

The versions of the paper that follow are the versions that were submitted during the peer review process. They are not the versions of record or the final published versions. They should not be cited or distributed as the published version of this manuscript.

BMJ Open is an open access journal and the full, final, typeset and author-corrected version of record of the manuscript is available on our site with no access controls, subscription charges or pay-per-view fees (<http://bmjopen.bmj.com>).

If you have any questions on BMJ Open's open peer review process please email [info.bmjopen@bmj.com](mailto:info.bmjopen@bmj.com)

# BMJ Open

## Clinician and patient perspectives on the barriers and facilitators to physical rehabilitation in intensive care: a qualitative interview study

|                               |                                                                                                                                                                                                                                                                                                                                                                                                                                                                                                                                                                                                                                                                       |
|-------------------------------|-----------------------------------------------------------------------------------------------------------------------------------------------------------------------------------------------------------------------------------------------------------------------------------------------------------------------------------------------------------------------------------------------------------------------------------------------------------------------------------------------------------------------------------------------------------------------------------------------------------------------------------------------------------------------|
| Journal:                      | <i>BMJ Open</i>                                                                                                                                                                                                                                                                                                                                                                                                                                                                                                                                                                                                                                                       |
| Manuscript ID                 | bmjopen-2023-073061                                                                                                                                                                                                                                                                                                                                                                                                                                                                                                                                                                                                                                                   |
| Article Type:                 | Original research                                                                                                                                                                                                                                                                                                                                                                                                                                                                                                                                                                                                                                                     |
| Date Submitted by the Author: | 08-Mar-2023                                                                                                                                                                                                                                                                                                                                                                                                                                                                                                                                                                                                                                                           |
| Complete List of Authors:     | Woodbridge, Huw; Imperial College Healthcare NHS Trust; Imperial College London, Department of Surgery and Cancer<br>Norton, Christine; Kings College London, Florence Nightingale Faculty of Nursing, Midwifery and Palliative Care<br>Jones, Mandy ; Brunel University London<br>Brett, Stephen; Imperial College Healthcare NHS Trust, Anaesthetics and Intensive Care; Imperial College London, Department of Surgery and Cancer<br>Alexander, Caroline; Imperial College Healthcare NHS Trust, Therapies; Imperial College London, MSk Labs<br>Gordon, Anthony; Imperial College London, Department of Surgery and Cancer; Imperial College Healthcare NHS Trust |
| Keywords:                     | Adult intensive & critical care < INTENSIVE & CRITICAL CARE, QUALITATIVE RESEARCH, REHABILITATION MEDICINE                                                                                                                                                                                                                                                                                                                                                                                                                                                                                                                                                            |
|                               |                                                                                                                                                                                                                                                                                                                                                                                                                                                                                                                                                                                                                                                                       |

SCHOLARONE™  
Manuscripts

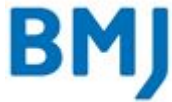

I, the Submitting Author has the right to grant and does grant on behalf of all authors of the Work (as defined in the below author licence), an exclusive licence and/or a non-exclusive licence for contributions from authors who are: i) UK Crown employees; ii) where BMJ has agreed a CC-BY licence shall apply, and/or iii) in accordance with the terms applicable for US Federal Government officers or employees acting as part of their official duties; on a worldwide, perpetual, irrevocable, royalty-free basis to BMJ Publishing Group Ltd ("BMJ") its licensees and where the relevant Journal is co-owned by BMJ to the co-owners of the Journal, to publish the Work in this journal and any other BMJ products and to exploit all rights, as set out in our [licence](#).

The Submitting Author accepts and understands that any supply made under these terms is made by BMJ to the Submitting Author unless you are acting as an employee on behalf of your employer or a postgraduate student of an affiliated institution which is paying any applicable article publishing charge ("APC") for Open Access articles. Where the Submitting Author wishes to make the Work available on an Open Access basis (and intends to pay the relevant APC), the terms of reuse of such Open Access shall be governed by a Creative Commons licence – details of these licences and which [Creative Commons](#) licence will apply to this Work are set out in our licence referred to above.

Other than as permitted in any relevant BMJ Author's Self Archiving Policies, I confirm this Work has not been accepted for publication elsewhere, is not being considered for publication elsewhere and does not duplicate material already published. I confirm all authors consent to publication of this Work and authorise the granting of this licence.

1  
2  
3 **Clinician and patient perspectives on the barriers and facilitators to physical**  
4 **rehabilitation in intensive care: a qualitative interview study.**  
5  
6  
7  
8  
9

10  
11 **Authors**  
12

13  
14 Huw R. Woodbridge\*

- 15
  - 16 • Imperial College Healthcare NHS Trust, London, UK; Imperial College London, London, UK.

17  
18 Christine Norton

- 19
  - 20 • King's College London, London, UK.

21  
22 Mandy Jones

- 23
  - 24 • Brunel University London, London, UK.

25  
26 Stephen J. Brett

- 27
  - 28 • Imperial College Healthcare NHS Trust, London, UK; Imperial College London, London, UK.

29  
30 Caroline M. Alexander

- 31
  - 32 • Imperial College Healthcare NHS Trust, London, UK; Imperial College London, London, UK.

33  
34 Anthony C. Gordon

- 35
  - 36 • Imperial College London, London, UK; Imperial College Healthcare NHS Trust, London, UK.

37  
38 \*Corresponding author: Physiotherapy Department, St Mary's Hospital, Praed Street,  
39 London W2 1NY. Email: [huw.woodbridge@nhs.net](mailto:huw.woodbridge@nhs.net) Telephone: 0203 312 1794.  
40  
41  
42  
43  
44  
45  
46

47 **Keywords:** Adult intensive & critical care; qualitative research; rehabilitation medicine.  
48

49 **Word count:** 5381  
50  
51  
52  
53  
54  
55  
56  
57  
58  
59  
60

## Abstract

### Objectives

To explore patient, relative/carer and clinician perceptions of barriers to early physical rehabilitation in intensive care units (ICU) within an associated group of hospitals in the United Kingdom (UK) and how they can be overcome.

### Design

Qualitative study using semi-structured interviews and thematic framework analysis.

### Setting

Four ICUs over three hospital sites in London, UK.

### Participants

Former ICU patients or their relatives/carers with personal experience of ICU rehabilitation. ICU clinicians, including doctors, nurses, physiotherapists and occupational therapists, involved in the delivery of physical rehabilitation or decisions over its initiation.

### Interventions

Nil

### Primary and secondary outcomes measures

Views and experiences on the barriers and facilitators to ICU physical rehabilitation.

### Results

Interviews were carried out with 11 former patients, 3 family members and 16 clinicians. The themes generated related to: safety and physiological concerns; patient participation and engagement; clinician experience and knowledge; teamwork; equipment and environment; and risks and benefits of rehabilitation in intensive care. The overarching theme related to how barriers can be overcome by moving away from a multidisciplinary approach and towards an interdisciplinary, patient-centred approach to ICU physical rehabilitation. This involves a change in working model from ICU clinicians having separate

responsibilities to one where all parties have a shared aim of providing physical rehabilitation.

### Conclusions

The results have revealed barriers that can be modified to improve rehabilitation delivery in an ICU. Interdisciplinary working could overcome many of these barriers to optimise recovery from critical illness.

### **Strengths and limitations of this study**

- This study explored the perspectives of multiple stakeholders including intensive care clinicians from different professions, with a range of experience. Importantly, the views of former ICU patients and their family members were sought to obtain a full range of perspectives on the barriers to ICU rehabilitation.
- Thematic framework analysis was used which enables a systematic approach to organising data, facilitating in-depth exploration of the range of views within themes and between participant groups.
- Patient and family recall of their experiences may have been impacted by the time from intensive care admission to interview, however interviews took place at the first follow up opportunity to minimise this effect.
- Efforts were made to gain a range of perspectives using purposive sampling; however, fewer family members or carers took part in this study than former ICU patients.

### **Introduction**

The importance of physical rehabilitation of critically ill patients has been recognised because of the prevalence of acute muscle weakness and wasting<sup>1-3</sup>, and longer-term substantial physical disability measured in this patient group<sup>2,4,5</sup>. Physical rehabilitation consists of physical activity interventions (typically mobilising in or away from the bed) that are begun once a patient has reached physiological stability<sup>6-8</sup>. Beginning physical

1  
2  
3 rehabilitation at an appropriate dose whilst patients are still in an intensive care unit (ICU)  
4 can improve physical function whilst in hospital and expedite discharge <sup>9</sup>, although  
5 implementing rehabilitation at a higher dose is not necessarily beneficial <sup>10</sup>. However, when  
6 measured, there is concern that the actual amount of formal physical rehabilitation  
7 delivered and patient participation in exercise whilst in intensive care are low <sup>11-13</sup>.

8  
9  
10  
11  
12  
13 Studies have previously measured the barriers to implementing rehabilitation, the majority  
14 of which use a quantitative approach <sup>14</sup>. However, a qualitative approach is better-suited to  
15 exploring interpersonal relations <sup>15</sup> and therefore potential barriers relating to team working  
16 and patient interactions. Where a qualitative approach has been used, issues of  
17 communication and differences in opinion between clinicians <sup>16-21</sup> and difficulty in providing  
18 rehabilitation in an environment where demands on staff and patient time change quickly  
19 have been highlighted <sup>19 22 23</sup>. However, the lack of rehabilitation in intensive care continues  
20 despite this current understanding of the barriers. Importantly, there is a lack of in-depth  
21 knowledge of barriers in a United Kingdom (UK) setting, which includes views of multiple  
22 stakeholders such as ICU clinicians from different professions involved in implementing  
23 rehabilitation, as well as patients and family members <sup>18 24-26</sup>.

24  
25  
26  
27  
28  
29  
30  
31  
32  
33  
34 The objective of this study therefore, was to explore service user (patients or their  
35 relatives/carers) and clinician perceptions of barriers to early physical rehabilitation in ICUs  
36 within an associated group of hospitals in the UK and how they can be overcome.

## 37 38 39 40 41 42 43 **Methods**

44  
45  
46 A qualitative study using semi-structured interviews was conducted based on the approach  
47 recommended by the National Centre for Social Research. This is based upon critical realism  
48 and interpretivism using the framework approach to analysis <sup>27</sup>. Ethical approval was gained  
49 from the London – Bloomsbury Research Ethics Committee (17/LO/0362) and written,  
50 informed consent was gained from all participants. This study is reported in line with the  
51 consolidated criteria for reporting qualitative research <sup>28</sup> (supplemental file 1).

52  
53  
54  
55  
56  
57  
58 The study was based at a UK National Health Service (NHS) hospital trust in London, which  
59 has four ICUs for adult patients across three hospital sites, each of which has different  
60

1  
2  
3 referring specialities. Purposive sampling<sup>29 30</sup> was used to recruit a range of service users  
4 (former ICU patients and their family members/carers) and the hospital's ICU clinicians from  
5 the different ICU settings, from different professional groups with a range of experience  
6 levels. Clinicians were included if they were doctors (senior trainees [registrars/fellows] or  
7 consultants), nurses, occupational therapists or physiotherapists with at least two months of  
8 ICU experience and who had experience of rehabilitation treatments or deciding when they  
9 should be initiated. Clinicians were approached via adverts in meetings, posted in staff areas  
10 or via general group or more targeted emails. Former ICU patients and family members  
11 were included if they had personal experience of physical rehabilitation whilst in ICU.  
12 Participants were excluded if they could not attend an in-person interview, if they felt  
13 unable to participate in English, if they were less than 18 years of age or unable to give  
14 informed consent. Patients or their relatives/carers were approached via local ICU patient  
15 support groups and follow up clinics. Estimates were that 30 participants would be required  
16 to gain a sufficient range of perspectives, with sampling ending once apparent data  
17 saturation had been reached. Data saturation was defined a priori as when no new themes  
18 of barriers and facilitators were evident from interviews, as decided by the study steering  
19 group. During data collection, when the interviewer felt no new themes were being  
20 discussed, the latest version of the initial thematic framework was shown to the final  
21 clinician and patient participant as a sense check to see whether they could identify any  
22 additional themes that had been missed. Following this, the initial thematic framework was  
23 reviewed by clinical colleagues from all four professional groups included in the study, as  
24 well as steering group members who were former ICU patients, to discuss if any obvious  
25 themes were missing.

26  
27  
28  
29  
30  
31  
32  
33  
34  
35  
36  
37  
38  
39  
40  
41  
42  
43  
44  
45  
46 Interviews took place at the hospital site and only included the interviewer and the  
47 individual participant. Each participant took part in one semi-structured interview. Before  
48 the interview began, participants were asked for demographic data then the interview  
49 proceeded using a topic guide (supplemental file 2), designed by the research steering group  
50 which included the input of former ICU patients. The interview was piloted with both  
51 clinicians and former patients. The format of the interview was a conversation, where  
52 wording was not fixed and prompts were used to gain greater depth of understanding of  
53 participant views and experiences. Participants were asked to define physical rehabilitation  
54  
55  
56  
57  
58  
59  
60



1  
2  
3 themselves, however, the study was designed based on rehabilitation consisting of  
4 mobilisation treatments ranging from exercises and movement in the bed, to mobilising out  
5 of bed and walking<sup>8</sup>. Participants were informed of this if they had difficulty defining  
6 rehabilitation or if their definition was markedly different from how the study  
7 conceptualised rehabilitation. Each interview was recorded and then transcribed verbatim.  
8 Transcripts were not returned to participants for review in line with current thinking about  
9 usefulness of this approach<sup>31</sup>.

10  
11 All interviews were carried out by one interviewer (HRW) who is a male physiotherapist,  
12 working full-time on the research study as part of work towards a doctorate, with training in  
13 qualitative research methods. The interviewer had previous clinical experience at several of  
14 the ICUs that were settings for this study, including working alongside some of the clinician  
15 participants, but not the patients or their relatives/carers. The researcher therefore had  
16 previous experiences of barriers and facilitators of rehabilitation in the study setting. These  
17 influences were taken into account using a reflexive diary before and after data collection,  
18 which was then considered during the analysis process.

19  
20 Thematic framework analysis<sup>32 33</sup> was used to produce themes based on the interview  
21 transcript data. This involves drawing up an initial list of themes that summarised all the  
22 interview data (supplemental file 2). Data were then arranged in a framework table which  
23 structured what each participant had said about each initial theme in an easily accessible  
24 form. This facilitated the production of a final set of themes and subthemes and comparison  
25 of how these vary between groups of participants. Analysis was facilitated by the use of  
26 NVivo 11 software (QSR International) and carried out by the first author (HRW). A second  
27 researcher (MJ) reviewed 10% of interview transcripts and confirmed that they matched the  
28 initial set of themes. At several stages during the analysis process, the research steering  
29 group met to review the data, discuss uncertainties over formation of themes and as a  
30 check on the process. Descriptive statistics were used to summarise demographic data using  
31 IBM SPSS Statistics. Continuous data were tested for normality using the Shapiro-Wilk test  
32 and non-normally distributed data described using median and interquartile range, and  
33 normally distributed data described using mean and standard deviation.

### Patient and public involvement

Former ICU patients were members of the research steering group. These patient representatives edited the wording of recruitment materials and inputted into the design of the topic guide. They also assisted the interviewer (HRW) to practice interview technique and were involved in reviewing the initial thematic framework, as part of data saturation checks.

### **Results**

Recruited participants included 16 clinicians, from a range of professions, with a range of experience in different settings (Table 1). Eleven former ICU patients and three family members/caregivers participated, all with experience of ICU rehabilitation (Table 2). Initially, 53 potential participants expressed interest in taking part, of whom 30 were recruited before data saturation was achieved. Five declined or were not available for interview, three did not respond further after initial contact, data saturation was achieved before four were recruited and 11 were not recruited as others were chosen instead to gain a greater range of views, as per the purposive sampling strategy. Interviews lasted for a mean 43 minutes (standard deviation  $\pm$  11 minutes).

**Table 1: Clinician participant demographics**

|                                                                                                              | <b>Clinicians<br/>(N=16)</b> |
|--------------------------------------------------------------------------------------------------------------|------------------------------|
| Age, mean ( $\pm$ SD)                                                                                        | 34 (8.6)                     |
| Gender: female, n (%)                                                                                        | 12 (75)                      |
| Profession, n (%)                                                                                            |                              |
| Doctor                                                                                                       | 4 (25)                       |
| Nurse                                                                                                        | 5 (31)                       |
| Therapist (physiotherapist or occupational therapist)                                                        | 7 (44)                       |
| Seniority, n (%)                                                                                             |                              |
| Team leader                                                                                                  | 9 (56)                       |
| Senior clinician                                                                                             | 6 (38)                       |
| Junior clinician                                                                                             | 1 (6)                        |
| Number of years of ICU experience, median (IQR)                                                              | 6 (1-15)                     |
| Number of years of clinical healthcare experience, mean ( $\pm$ SD)                                          | 11 (8)                       |
| Place of work*, n (%)                                                                                        |                              |
| Intensive care 1                                                                                             | 5 (31)                       |
| Intensive care 2                                                                                             | 6 (38)                       |
| Intensive care 3                                                                                             | 5 (31)                       |
| Intensive care 4                                                                                             | 5 (31)                       |
| Involvement in physical rehabilitation, n (%)                                                                |                              |
| Participating in the decision over whether a patient is stable enough to mobilise.                           | 16 (100)                     |
| Leading rehabilitation treatment                                                                             | 10 (63)                      |
| Assisting with rehabilitation treatment                                                                      | 12 (75)                      |
| SD= standard deviation; IQR=interquartile range. *Some clinicians work on more than one intensive care unit. |                              |

**Table 2: Patient and caregiver participant demographics**

|                                                                                         | Former ICU patients and caregivers (N=14) |
|-----------------------------------------------------------------------------------------|-------------------------------------------|
| Service user participants:                                                              |                                           |
| Patients, n (%)                                                                         | 11 (79)                                   |
| Caregivers, n (%)                                                                       | 3 (21)                                    |
| Age, mean ( $\pm$ SD)                                                                   | 65 (10.7)                                 |
| Male, n (%)                                                                             | 10 (71)                                   |
| Patient ICU length of stay in days* (n=11), mean ( $\pm$ SD)                            | 15 (10.8)                                 |
| Patient stated reason for admission (n=11), n (%)                                       |                                           |
| Aortic dissection                                                                       | 1 (9)                                     |
| Cardiac arrest                                                                          | 1 (9)                                     |
| Gastrointestinal                                                                        | 1 (9)                                     |
| Organ failure                                                                           | 1 (9)                                     |
| Septic shock                                                                            | 1 (9)                                     |
| Surgery                                                                                 | 5 (45)                                    |
| Trauma                                                                                  | 1 (9)                                     |
| Site where ICU was experienced, n (%)                                                   |                                           |
| Intensive care 1                                                                        | 2 (14)                                    |
| Intensive care 2                                                                        | 11 (79)                                   |
| Intensive care 3                                                                        | 0 (0)                                     |
| Intensive care 4                                                                        | 1 (7)                                     |
| Highest level of physical rehabilitation experienced, n (%)                             |                                           |
| Moving in bed                                                                           | 2 (14)                                    |
| Sitting in a chair                                                                      | 6 (43)                                    |
| Walking                                                                                 | 6 (43)                                    |
| SD= standard deviation. *Two participants reported their length of stay as approximate. |                                           |

The study themes and subthemes are described in detail below. The supplementary material illustrates these themes and subthemes with verbatim quotes from participants, with participant numbers (see supplemental file 2 to link quote numbers with data).

### 1. Safety and physiological concerns

Participant concerns over the safety of rehabilitation were reported as a barrier to rehabilitation. This included the risk of dislodging lines and attachments (such as ventilator tubing and femoral lines (quote 1). However, some participants did not perceive this as a barrier, if careful planning and also organisation of the bed space environment was carried out. For example, avoiding the use of femoral vascular catheters as access for haemofiltration or planning breaks in haemofiltration could enable rehabilitation. Endotracheal tubes or airways that had been difficult to insert, were also cited as barriers,

1  
2  
3 with the difficulty of titrating sedation for a balance between tube tolerance and patient  
4 alertness cited as one explanation.  
5  
6

7  
8 Clinician participants identified particular patient groups with barriers to rehabilitation  
9 because they felt they were at an increased risk or they presented additional logistical  
10 challenges, such as those with multiple traumatic injuries (quote 2). They suggested that  
11 patients admitted after surgery could have certain surgical precautions which presented  
12 logistical issues contacting different teams to gain clarity over safety of rehabilitation.  
13  
14 Despite this, patients in ICU after elective surgery could have received pre-operative  
15 education or pre-planned rehabilitation programmes, both facilitating rehabilitation post-  
16 operatively.  
17  
18

19  
20  
21  
22  
23 Physiological instability, such as instances of respiratory distress or cardiovascular instability  
24 were reported as preventing rehabilitation treatments.  
25  
26

27  
28 *“...it’s mainly blood pressure related for me, or their resp[iratory] rate. If I don’t think*  
29 *they’re going to tolerate mobilising, and if it’s going to cause more harm than good.”*  
30 *(Therapist 2, quote 3)*  
31  
32

33  
34 Dependence on organ support, such as the amount of respiratory support or vasoactive  
35 drugs were also identified as barriers. Clinician opinion ranged from perceiving patients  
36 receiving vasoactive drugs as a contraindication to rehabilitation (quote 4), to others who  
37 considered rehabilitation possible if a low or weaning dose was used or if the patient was  
38 less severely unwell, for example if vasoactive drugs were being used for epidural-induced  
39 hypotension. Risk relating to hypotension during rehabilitation was suggested to relate to  
40 anxiety from junior staff about managing vasoactive drugs during mobilisation (quote 5).  
41  
42 Participants suggested potential organ support barriers should always be discussed with the  
43 ICU doctors and also advocated actively sedating patients less.  
44  
45  
46  
47  
48  
49

50  
51 Patient participants sometimes reported feeling too unwell to actively participate in  
52 rehabilitation. Some patients reported profound feelings of weakness, making their bodies  
53 feel ‘like a lead weight’, which came as a surprise when they first tried to get up and was  
54 linked with feelings of vulnerability (quotes 6 and 7). These participants did then identify a  
55  
56  
57  
58  
59  
60

1  
2  
3 time in their recovery where these symptoms subsided to the point where they could then  
4 participate.  
5

6  
7 Additionally, level of alertness, confusion and agitation, cognitive impairments and  
8 personality disorders were all cited as barriers by clinicians (quote 8). Some patients and  
9 relatives recalled experiences of delirium and hallucinations as profound influences on their  
10 recovery in general.  
11  
12

13  
14 The difference between clinicians' perception of safety and a patient's readiness to begin  
15 rehabilitation was expressed as a barrier (quote 9). Some explanations included clinician  
16 fear of the unwell patient and the risk of perceived harm which caused anxiety for some  
17 (quote 10).  
18  
19

20  
21  
22  
23  
24 *"...happy to cause no harm, or kind of, and no perceived harm by not mobilising*  
25 *someone but actively getting up and causing harm is a, always going to be a*  
26 *significant anxiety for staff..." (Nurse 5, quote 11)*  
27  
28

29  
30 This was linked to clinician need for control over the physiological numbers, potentially  
31 leading to a reluctance to reduce that control by moving a patient out of bed (quote 12).  
32 One doctor suggested that a paradigm shift was required to address this barrier (quote 13).  
33 Another doctor said they modified targets for acceptable changes in physiological  
34 observations (such as blood pressure), to reassure other clinicians that mobility was still safe  
35 (quote 14).  
36  
37  
38  
39  
40  
41  
42  
43  
44

## 45 2. Patient participation and engagement

46  
47 Clinician participants reported that patients may be reluctant to participate in rehabilitation.  
48 Patient participant responses ranged from reporting enthusiastic engagement in  
49 rehabilitation, to not wishing to mobilise out of bed. Reasons cited for their reluctance  
50 included not wanting to do something perceived as potentially worsening their condition  
51 (quote 15). Furthermore, a lack of incentive or motivation to engage was discussed, as well  
52 as a feeling of weakness, which some found difficult to accept.  
53  
54  
55  
56  
57  
58  
59  
60

1  
2  
3                   *"...there were times when I simply didn't want to do it... Depression, ... lack of energy,*  
4                   *lack of spirits really ..."* (Patient 7, quote 16)  
5  
6

7  
8 Suboptimal communication between patients and clinicians was felt to be a barrier to  
9  
10 rehabilitation. Suggested reasons included the little time spent by clinicians discussing  
11  
12 rehabilitation, difficulty communicating rehabilitation goals and some sometimes showed a  
13  
14 lack of empathy. Suggested ways of overcoming these issues included maximising a  
15  
16 patient's ability to communicate, giving more reassurance, building up trust, showing  
17  
18 kindness and helping patients to feel safe (quote 17). Patients valued humour from staff and  
19  
20 felt rapport was aided by staff continuity. Patients and relatives recommended that when a  
21  
22 patient was reluctant to mobilise, an encouraging and diplomatic approach balanced with  
23  
24 assertiveness from clinicians to "push" patients (quote 18).

25  
26 Participants recommended that strategies to improve patient engagement in rehabilitation  
27  
28 should always be patient-specific. Other suggestions included promoting sleep at night,  
29  
30 involving patients in planning a rehabilitation timetable, goal setting and using outcome  
31  
32 measures to demonstrate progress (quote 19). Furthermore, education for patients and  
33  
34 relatives at the appropriate time, around the importance of rehabilitation was suggested.

35  
36 Further facilitators included the use of meaningful activities and identifying key patient  
37  
38 motivators. The importance of tailoring rehabilitation to include activities meaningful to  
39  
40 patients (such as functional tasks and personal care activities based on previous interests)  
41  
42 were identified to facilitate engagement within a context more readily understood by  
43  
44 patients.

45                   *"Looking at therapy in a slightly different way and finding an activity that's*  
46                   *meaningful to [patients], whether that's personal care or leisure activities, and*  
47                   *through that encouraging them to... engage in that activity and then helping them to*  
48                   *see the therapeutic value of that."* (Therapist 4, quote 20)  
49  
50  
51

52  
53 Recognising key patient motivators such as gaining independence and dignity by being able  
54  
55 to do more for themselves was also suggested (quote 21). Patients reported being  
56  
57 motivated through their improvement during rehabilitation sessions, almost as a proxy for  
58  
59  
60

1  
2  
3 improvement from critical illness. Patient qualities of resilience, determination and a  
4 positive mental attitude were reported as a facilitator.  
5  
6  
7

8 The role of family was discussed as both a barrier and facilitator. Some instances were  
9 reported where relatives could be reluctant for patient participation in rehabilitation. When  
10 this was discussed with patient and relative participants, responses ranged from an  
11 understanding of why this happens, to a strong disbelief that this could be the case. The role  
12 of family in encouraging patients was discussed, with some highlighting how they were  
13 motivated to improve mobility to help their family member feel better (quote 22).  
14  
15  
16  
17  
18  
19

### 20 3. *Clinician experience and knowledge*

21  
22 Clinician participants discussed the experience and knowledge of those carrying out  
23 rehabilitation. A lack of experience, confidence and senior support were cited as barriers  
24 (quote 23). However, some therapists also proposed those clinicians with more experience  
25 could pose a barrier. They suggested some more experienced nurses may perceive  
26 rehabilitation as outside of their role or may have spent more time in an environment  
27 where rehabilitation was not a priority. Opinions over experience as a facilitator also varied.  
28 Some emphasised that a team with the right skill mix (including adequate senior support)  
29 was important, with a nurse suggesting having more confident staff freed up time for  
30 rehabilitation. However, some therapists reported that more inexperienced nurses could be  
31 a facilitator as they have received recent training in rehabilitation. One therapist cited  
32 enthusiasm as being more important than experience to facilitate rehabilitation.  
33  
34  
35  
36  
37  
38  
39  
40  
41  
42  
43

44 A lack of training and knowledge, including about the importance of rehabilitation,  
45 organisation and planning of sessions and therapeutic manual handling were suggested as  
46 important factors.  
47  
48  
49

50 *“It doesn’t happen because... we are not aware enough yet how important it is, or*  
51 *how much difference it could make, so it’s not embedded in our thinking and in our*  
52 *behaviour...” (Doctor 4, quote 24)*  
53  
54  
55

56 A popular strategy to address these barriers was through education and training for the ICU  
57 interdisciplinary team, such as through study days and experiential learning (quote 25).  
58  
59  
60



1  
2  
3 Additionally, the use of a rehabilitation policy and guidelines to drive implementation and  
4 aid less experienced clinicians know when to begin rehabilitation was discussed.  
5  
6  
7  
8

#### 9 4. Teamwork

10  
11 Discussion of teamwork covered team culture, clinician roles, rehabilitation definitions and  
12 logistics. A lack of a rehabilitation culture leading to some staff having a less proactive  
13 attitude to rehabilitation delivery was discussed.  
14  
15  
16  
17

18 *“But a lot of it’s just to do with the attitude of the individual staff member, how*  
19 *proactive they are and how much they believe in mobilisation as a kind of key thing”*  
20 *(Nurse 5, quote 26)*  
21  
22  
23  
24

25 One explanatory factor was a lack of medical leadership. Participants suggested promoting a  
26 culture where an interdisciplinary team works together to promote rehabilitation as routine  
27 and important, would facilitate implementation. A less hierarchical culture would encourage  
28 proactive team planning and problem solving, with medical leadership again emphasised as  
29 key (quote 27).  
30  
31  
32  
33  
34

35 Another key barrier to rehabilitation was differences in opinion between professions over  
36 roles and responsibilities (quote 28). Some reported that rehabilitation was perceived as  
37 only a therapist’s job (quote 29). Therapists reported that there could be a lack of  
38 understanding of their role or their other responsibilities, for example, covering other  
39 clinical areas in addition to the ICU. To overcome this, clinicians suggested promoting  
40 teamwork where separate responsibilities were acknowledged and there was a willingness  
41 to crossover professional roles, with therapists empowering nurses to facilitate  
42 rehabilitation (quote 30).  
43  
44  
45  
46  
47  
48  
49

50 Differences in opinions over roles and responsibilities were impacted upon by variation in  
51 how rehabilitation was defined and delivered. This in itself may explain some of the  
52 difficulty in promoting a proactive rehabilitation culture. Participants noted that doctors and  
53 nurses sometimes limited their definition of rehabilitation to a patient sitting out in a chair  
54 (quote 31). Conversely, occupational therapist (OT) participants widened the concept of  
55  
56  
57  
58  
59  
60

1  
2  
3 rehabilitation to encompass a twenty-four hour interdisciplinary approach utilising  
4 functional tasks.  
5  
6  
7

8 *“...rehabilitation is not, you know, 20 minutes with the physio or the OT every day.*  
9 *Really good rehabilitation is a 24 hour approach, and that – part of that is positioning*  
10 *a patient in bed. Part of that is ensuring the patient gets the right nutrition as well as*  
11 *looking at the actual physical things that they’re doing.” (Therapist 4, quote 32)*  
12  
13  
14  
15

16 This may increase patient engagement and interdisciplinary involvement, by helping staff to  
17 incorporate more rehabilitation activities during the course of their normal duties, for  
18 example during personal care activities (quote 33).  
19  
20  
21  
22

23 Finally, lack of staff and logistical difficulties in implementing rehabilitation were suggested  
24 as barriers. Greater investment in staffing and utilisation of healthcare support workers was  
25 suggested to address this. Logistical concerns covered the number of staff required and the  
26 duration of a rehabilitation session in competition with other unit procedures. Logistical  
27 barriers also concerned a difficulty in timing around nurses’ rest breaks and staffing ratios  
28 (quote 34). Within the study ICUs, once a patient’s illness severity decreased to a certain  
29 level, the nursing staffing ratio fell from one nurse to one patient to one nurse to two  
30 patients, coinciding with a potential increase in readiness for rehabilitation. Potential  
31 strategies to address these concerns include proactive planning of sessions, for example  
32 during morning team briefings. Additionally, a change to working patterns to build in more  
33 time for rehabilitation to occur was suggested.  
34  
35  
36  
37  
38  
39  
40  
41  
42  
43  
44  
45

#### 46 *5. Equipment and environment*

47

48 A lack of working specialist rehabilitation equipment was highlighted as a barrier (quote 35).  
49 Clinicians advocated greater investment and suggested the whole team to take ownership  
50 of ensuring equipment was fixed or to find funding sources for equipment replacement.  
51 Environmental concerns firstly covered practical limitations such as space to move  
52 rehabilitation equipment around the bedspace. Furthermore, a patient highlighted the  
53 nature of the ICU environment itself did not encourage them to move out of bed (quote 36).  
54  
55  
56  
57  
58  
59  
60

1  
2  
3  
4  
5  
6  
7  
8  
9  
10  
11  
12  
13  
14  
15  
16  
17  
18  
19  
20  
21  
22  
23  
24  
25  
26  
27  
28  
29  
30  
31  
32  
33  
34  
35  
36  
37  
38  
39  
40  
41  
42  
43  
44  
45  
46  
47  
48  
49  
50  
51  
52  
53  
54  
55  
56  
57  
58  
59  
60

*“...you can see some bright lights and monitors, you can hear monitors going off, but you don’t have the, “Crash, bang, wallops!” that you get in a general ward... but it’s a capsule and a bubble, it’s a weird feeling... “People think it’s like being in a spaceship” and I thought, “That’s such a good description” and that’s how it did feel.” (Patient 8, quote 37)*

#### 6. Risks and benefits of rehabilitation in intensive care

Opinions over risks and benefits were explored, which closely related to safety, knowledge and attitude towards rehabilitation. Clinician ideas about risks resembled the safety issues from theme one, however, this did not necessarily mean a reluctance to mobilise (quotes 38 and 39). Most patients and relatives reported they had not worried about the risks of mobilising whilst in an ICU (quote 40), although some had experienced things such as dizziness and one reported passing out. Considering benefits, reported physical benefits of rehabilitation focused on the acute impact of improving physical function, including in preparation for recovery on the wards (quote 41). Suggested psychological benefits for the patient included helping mood and wellbeing and restoring a sense of dignity.

*“...the important thing is you sense that you’re not just lying there waiting to die. ...so you are... you are... coming back to being a human being that wants to live.” (Patient 7, quote 42)*

Finally, several clinicians reported how a benefit of patient rehabilitation was the encouragement and sense of achievement it provided for staff.

The overarching theme for how to overcome barriers to physical ICU rehabilitation related to moving from a multidisciplinary approach where different professions work together but have separate responsibilities; towards a patient-centred, interdisciplinary team approach. This was where all parties have a shared aim of providing physical rehabilitation (quotes 27 and 30). This can facilitate clinicians working together to develop a shared understanding of the definition of rehabilitation, so patients can participate in activities that are more meaningful. Furthermore, an agreement can be developed among the team, about the benefits and risks, the optimum way to deliver rehabilitation and when it is safe to start.

1  
2  
3 This can then help different professions to collaborate to help to overcome barriers related  
4 to team working and to improve the ICU environment.  
5  
6  
7  
8  
9

## 10 **Discussion**

11  
12  
13 This study has provided an in-depth exploration of the views of multi-professional ICU  
14 clinicians and was strengthened by including former ICU patients and their relatives, adding  
15 to the knowledge of overcoming barriers to ICU physical rehabilitation. Primarily this is  
16 suggested to be through a change in approach to team working, from a multidisciplinary to  
17 an interdisciplinary and patient-centred approach. This means moving from a  
18 multidisciplinary way of working where a team is made up of different professions working  
19 on their distinct priorities<sup>34-36</sup>, to an interdisciplinary approach where a team of different  
20 professions work together with ICU rehabilitation a priority for all. This therefore  
21 emphasises a shift from rehabilitation primarily being the focus of therapy staff, to one  
22 where all team members have joint accountability and identify this as a key aspect to their  
23 work, contributing in overlapping ways but also in ways relevant to their professional skills  
24 and knowledge<sup>37-38</sup>. This change in perspective could facilitate a change in opinion over the  
25 definition and delivery of rehabilitation towards an interdisciplinary, 24-hour approach that  
26 includes activities meaningful to patients to facilitate engagement. An interdisciplinary  
27 working model has previously been used to facilitate more efficient and effective care  
28 during critical illness and in general rehabilitation delivery. Reported outcomes have  
29 included more coordinated inter-professional working and enhanced delivery of appropriate  
30 patient care<sup>35-39-40</sup>.  
31  
32  
33  
34  
35  
36  
37  
38  
39  
40  
41  
42  
43  
44  
45  
46

47 It is interesting to see that several of the themes of barriers and facilitators to ICU  
48 rehabilitation are similar to previous qualitative studies. This includes themes of safety<sup>19-20</sup>  
49<sup>23-24-41</sup>, patient engagement<sup>25</sup>, knowledge and experience<sup>17-22</sup> and team work<sup>16-18-21-23-25-41</sup>.  
50  
51 Patient reports of experiencing feelings of weakness and vulnerability in this present study  
52 have also previously been identified<sup>26-42</sup> where their vulnerability may be explained, at least  
53 in part, by patients adjusting to being critically ill whilst having little or no memory of their  
54 deterioration into critical illness<sup>43</sup>. In our study, clinicians expressed differences in opinion  
55 over roles and responsibilities towards rehabilitation as well as safety concerns for initiating  
56  
57  
58  
59  
60

1  
2  
3 treatment. Staff confidence in rehabilitation provision may contribute towards differences  
4 in viewpoints and engagement. This may be partially explained through differences in  
5 personality traits between those more or less able to make pragmatic concessions to adjust  
6 to the limitations of the working environment to ensure reasonable care is delivered <sup>44</sup>. This  
7 would therefore represent an important factor to address with staff when overcoming  
8 barriers to rehabilitation.  
9  
10  
11  
12  
13

14  
15 This study has added to previous knowledge in several ways. Interestingly and perhaps  
16 surprisingly, less clinical experience was highlighted as a potential facilitator of  
17 rehabilitation. Some therapists reported that more inexperienced nurses have received  
18 recent training in rehabilitation and one therapist cited enthusiasm as more important than  
19 experience. Additionally, perceptions of the content of rehabilitation were notable. Some  
20 viewed rehabilitation as being limited to sitting in a chair. This can contribute to a limited  
21 scope of rehabilitation practice <sup>22</sup> and may have contributed to the lack of rehabilitation  
22 culture reported by some participants in this study. The occupational therapists emphasised  
23 the inclusion of personal care activities as part of ICU rehabilitation delivered at any point in  
24 the day by any profession, to facilitate a more positive rehabilitation culture. This is  
25 supported by Laerkner, et al. <sup>45</sup> who compared the views of nurses and patients in Denmark,  
26 and found nurses recommended incorporating familiar activities into rehabilitation and  
27 patients emphasised the importance of empathy and compromise from clinicians. Whilst  
28 patients in this present study agreed with Laerkner's recommendations of clinician-patient  
29 communication, they also emphasised that at times, a more assertive approach from  
30 clinicians in encouraging rehabilitation is desirable.  
31  
32  
33  
34  
35  
36  
37  
38  
39  
40  
41  
42  
43  
44

45 The findings from this study focus us to create a patient-centred interdisciplinary approach  
46 to rehabilitation. This involves considering how clinicians communicate with patients and  
47 broadening the definition of rehabilitation to include functional tasks that are meaningful to  
48 patients. Furthermore, broadening delivery of rehabilitation to a 24-hour holistic approach  
49 that includes family members, with a focus on prioritising patient-reported motivators of  
50 independence and dignity and to progress back towards normality. Facilitating this change  
51 in a multifaceted ICU environment would benefit from using implementation and  
52 improvement science methodology, where co-design by ICU clinicians from different  
53 professions, as well as service users can be employed. This change in practise should be  
54  
55  
56  
57  
58  
59  
60

1  
2  
3 evaluated not only in terms of whether it improves rehabilitation delivery without impacting  
4 patient safety, but also in terms of how these changes influence other ICU procedures and  
5 working practices <sup>46</sup>.  
6  
7

8  
9 Limitations of this study include the potential for poor recall from patient or relative/carer  
10 participants as the time from ICU admission to interview was not recorded. However, as  
11 participants were usually recruited at their first ICU follow up appointment, this was unlikely  
12 to be an extended time. Furthermore, language limitations of some participants sometimes  
13 made it difficult to discern the exact point they were making during analysis, therefore  
14 although this demonstrates diversity within the sample, some finer detail may have been  
15 lost. The method of approach may have meant that more patients actively engaged in the  
16 issues being evaluated were recruited. Those patients not attending follow up appointments  
17 may have had different opinions. Finally, pragmatic constrictions meant few family  
18 members were recruited and more patients who had experienced one of the ICU sites were  
19 involved.  
20  
21

22 In conclusion, this exploration of a range of clinician and patient perspective suggested a  
23 patient-centred, interdisciplinary approach to implementing ICU physical rehabilitation.  
24 These findings constitute a starting point for optimising rehabilitation delivery through  
25 improvement and implementation science.  
26  
27

### 28 **Acknowledgements**

29  
30 We thank staff at the research site for their support in facilitating recruitment and data  
31 collection. Data from this study has previously been presented at the Intensive Care Society  
32 State of the Art meeting 2018<sup>47</sup> and 2021<sup>48</sup>, the 6th European Conference on Weaning and  
33 Rehabilitation in Critically Ill Patients 2018 (abstract available on page 61 of an online  
34 conference book, [https://kuleuvencongres.be/icurecovery18/documents/conference-book-  
35 icurecovery.pdf](https://kuleuvencongres.be/icurecovery18/documents/conference-book-icurecovery.pdf)), Physiotherapy UK conference 2018<sup>49</sup> and the North West London Research  
36 Symposium for Health Professions 2018.  
37  
38

### 39 **Funding statement**

40  
41 This report is independent research arising from a Clinical Doctoral Research Fellowship,  
42 awarded to HRW, (ICA-CDRF-2015-01-026), supported by the National Institute for Health  
43  
44  
45  
46  
47  
48  
49  
50  
51  
52  
53  
54  
55  
56  
57  
58  
59  
60

1  
2  
3 Research (NIHR) and Health Education England. The views expressed in this publication are  
4 those of the authors and not necessarily those of the NHS, the NIHR, Health Education  
5 England or the Department of Health. We acknowledge the support of the NIHR Clinical  
6 Research Network and infrastructure support for this research was provided by the NIHR  
7 Imperial Biomedical Research Centre (BRC). HRW is supported by the NIHR Imperial BRC.  
8  
9  
10  
11  
12

### 13 **Competing interests statement**

14  
15  
16 HRW reports personal lecture fees from Brunel University and the University of East  
17 London. CN reports personal lecture fees from Janssen Pharmaceuticals and Web MD. CMA  
18 is a National Institute of Health Research PhD fellowship committee member, although not  
19 at the time that funding was awarded for this study. ACG reports salary support from an  
20 NIHR Research Professorship (RP-2015-06-018) and research support from the NIHR  
21 Imperial BRC.  
22  
23  
24  
25  
26  
27

### 28 **Author contributions**

29  
30 All authors made substantial contributions to the conception and design of this work. HRW  
31 carried out recruitment of participants, data collection and had main responsibility for  
32 carrying out analysis. MJ, CN and CMA assisted in checking development of themes and all  
33 authors advised on interpretation of data. HRW drafted this report and all authors revised it  
34 critically for important content and approved the final published version. All authors are  
35 accountable for the accuracy and integrity of the work.  
36  
37  
38  
39  
40  
41

### 42 **References**

- 43  
44  
45 1. Puthuchery ZA, Rawal J, McPhail M, et al. Acute skeletal muscle wasting in critical illness. *JAMA*  
46 2013;310:1591-600.  
47 2. Fan E, Dowdy DW, Colantuoni E, et al. Physical complications in acute lung injury survivors: a two-  
48 year longitudinal prospective study. *Crit Care Med* 2014;42:849-59.  
49 3. Latronico N, Herridge M, Hopkins RO, et al. The ICM research agenda on intensive care unit-  
50 acquired weakness. *Intensive Care Med* 2017;43:1270-81.  
51 4. Herridge MS, Tansey CM, Matte A, et al. Functional disability 5 years after acute respiratory  
52 distress syndrome. *N Engl J Med* 2011;364:1293-304.  
53 5. Hodgson CL, Udy AA, Bailey M, et al. The impact of disability in survivors of critical illness.  
54 *Intensive Care Med* 2017;43:992-1001.  
55 6. Bailey P, Thomsen GE, Spuhler VJ, et al. Early activity is feasible and safe in respiratory failure  
56 patients. *Crit Care Med* 2007;35:139-45.  
57 7. Clarissa C, Salisbury L, Rodgers S, et al. Early mobilisation in mechanically ventilated patients: a  
58 systematic integrative review of definitions and activities. *J Intensive Care* 2019;7:3.  
59  
60



- 1
- 2
- 3
- 4 8. Hodgson CL, Stiller K, Needham DM, et al. Expert consensus and recommendations on safety
- 5 criteria for active mobilization of mechanically ventilated critically ill adults. *Crit Care*
- 6 2014;18:658.
- 7 9. Wang YT, Lang JK, Haines KJ, et al. Physical Rehabilitation in the ICU: A Systematic Review and
- 8 Meta-Analysis. *Crit Care Med* 2021. <https://www.ncbi.nlm.nih.gov/pubmed/34406169>
- 9 (accessed 8th January 2022).
- 10 10. Team Study Investigators, Anzics Clinical Trials Group, Hodgson CL, et al. Early Active
- 11 Mobilization during Mechanical Ventilation in the ICU. *N Engl J Med* 2022;387:1747-58.
- 12 11. Connolly BA, Mortimore JL, Douiri A, et al. Low Levels of Physical Activity During Critical Illness
- 13 and Weaning: The Evidence-Reality Gap. *J Intensive Care Med* 2019;34:818-27.
- 14 12. Nydahl P, Ruhl AP, Bartoszek G, et al. Early mobilization of mechanically ventilated patients: a 1-
- 15 day point-prevalence study in Germany. *Crit Care Med* 2014;42:1178-86.
- 16 13. Bakhru RN, Wiebe DJ, McWilliams DJ, et al. An Environmental Scan for Early Mobilization
- 17 Practices in U.S. ICUs. *Crit Care Med* 2015;43:2360-9.
- 18 14. Parry SM, Knight LD, Connolly B, et al. Factors influencing physical activity and rehabilitation in
- 19 survivors of critical illness: a systematic review of quantitative and qualitative studies.
- 20 *Intensive Care Med* 2017;43:531-42.
- 21 15. Ormston R, Spencer L, Barnard M, et al. The foundations of qualitative research. In: Ritchie J,
- 22 Lewis J, McNaughton Nicholls C, et al., eds. *Qualitative research practice A guide for social*
- 23 *science students and researchers*. 2nd ed. London: SAGE 2014:1-25.
- 24 16. Barber EA, Everard T, Holland AE, et al. Barriers and facilitators to early mobilisation in Intensive
- 25 Care: a qualitative study. *Aust Crit Care* 2015;28:177-82; quiz 83.
- 26 17. Anekwe DE, Milner SC, Bussieres A, et al. Intensive care unit clinicians identify many barriers to,
- 27 and facilitators of, early mobilisation: a qualitative study using the Theoretical Domains
- 28 Framework. *J Physiother* 2020;66:120-27.
- 29 18. Chaplin T, McLuskey J. What influences nurses' decision to mobilise the critically ill patient? *Nurs*
- 30 *Crit Care* 2020;25:353-59.
- 31 19. Parry SM, Remedios L, Denehy L, et al. What factors affect implementation of early rehabilitation
- 32 into intensive care unit practice? A qualitative study with clinicians. *J Crit Care* 2017;38:137-
- 33 43.
- 34 20. Holdsworth C, Haines KJ, Francis JJ, et al. Mobilization of ventilated patients in the intensive care
- 35 unit: An elicitation study using the theory of planned behavior. *J Crit Care* 2015;30:1243-50.
- 36 21. Goddard SL, Lorencatto F, Koo E, et al. Barriers and facilitators to early rehabilitation in
- 37 mechanically ventilated patients-a theory-driven interview study. *J Intensive Care* 2018;6:4.
- 38 22. Krupp AE, Ehlenbach WJ, King B. Factors Nurses in the Intensive Care Unit Consider When
- 39 Making Decisions About Patient Mobility. *Am J Crit Care* 2019;28:281-89.
- 40 23. Eakin MN, Ugbah L, Arnautovic T, et al. Implementing and sustaining an early rehabilitation
- 41 program in a medical intensive care unit: A qualitative analysis. *J Crit Care* 2015;30:698-704.
- 42 24. Curtis L, Irwin J. Ambulation of patients who are mechanically ventilated: nurses' views. *Nurs*
- 43 *Manag* 2017;24:34-39.
- 44 25. Williams N, Flynn M. An exploratory study of physiotherapists' views of early rehabilitation in
- 45 critically ill patients. *Physiother Pract Res* 2013;34:93-102.
- 46 26. van Willigen Z, Ostler C, Thackray D, et al. Patient and family experience of physical rehabilitation
- 47 on the intensive care unit: a qualitative exploration. *Physiotherapy* 2020;109:102-10.
- 48 27. Ritchie J, Lewis J, McNaughton Nicholls C, et al. *Qualitative research practice. A guide for social*
- 49 *science students and researchers*. 2nd ed. London: SAGE 2014.
- 50 28. Tong A, Sainsbury P, Craig J. Consolidated criteria for reporting qualitative research (COREQ): a
- 51 32-item checklist for interviews and focus groups. *Int J Qual Health Care* 2007;19:349-57.
- 52 29. Bryman A. *Social research methods*. 5th ed. Oxford: Oxford University Press 2016.
- 53
- 54
- 55
- 56
- 57
- 58
- 59
- 60



- 1
- 2
- 3
- 4 30. Ritchie J, Lewis J, Elam G, et al. Designing and selecting samples. In: Ritchie J, Lewis J,
- 5       McNaughton Nicholls C, et al., eds. *Qualitative research practice A guide for social science*
- 6       *students and researchers*. 2nd ed. London: SAGE 2014:111-45.
- 7 31. McConnell-Henry T, Chapman Y, Francis K. Member checking and Heideggerian phenomenology:
- 8       a redundant component. *Nurse Res* 2011;18:28-37.
- 9 32. Spencer L, Ritchie J, Ormston R, et al. Analysis: Principles and processes. In: Ritchie J, Lewis J,
- 10       McNaughton Nicholls C, et al., eds. *Qualitative research practice A guide for social science*
- 11       *students and researchers*. 2nd ed. London: SAGE 2014:269-93.
- 12 33. Spencer L, Ritchie J, O'Connor W, et al. Analysis in practice. In: Ritchie J, Lewis J, McNaughton
- 13       Nicholls C, et al., eds. *Qualitative research practice A guide for social science students and*
- 14       *researchers*. 2nd ed. London: SAGE 2014:295-345.
- 15 34. Choi BC, Pak AW. Multidisciplinarity, interdisciplinarity and transdisciplinarity in health research,
- 16       services, education and policy: 1. Definitions, objectives, and evidence of effectiveness. *Clin*
- 17       *Invest Med* 2006;29:351-64.
- 18 35. Korner M. Interprofessional teamwork in medical rehabilitation: a comparison of
- 19       multidisciplinary and interdisciplinary team approach. *Clin Rehabil* 2010;24:745-55.
- 20 36. Jennings C, Astin F. A multidisciplinary approach to prevention. *Eur J Prev Cardiol* 2017;24:77-87.
- 21 37. Bronstein LR. A model for interdisciplinary collaboration. *Soc Work* 2003;48:297-306.
- 22 38. Petri L. Concept analysis of interdisciplinary collaboration. *Nurs Forum* 2010;45:73-82.
- 23 39. Irwin RS, Flaherty HM, French CT, et al. Interdisciplinary collaboration: the slogan that must be
- 24       achieved for models of delivering critical care to be successful. *Chest* 2012;142:1611-19.
- 25 40. Urisman T, Garcia A, Harris HW. Impact of surgical intensive care unit interdisciplinary rounds on
- 26       interprofessional collaboration and quality of care: Mixed qualitative-quantitative study.
- 27       *Intensive Crit Care Nurs* 2018;44:18-23.
- 28 41. Liew SM, Mordiffi SZ, Ong YJA, et al. Nurses' perceptions of early mobilisation in the adult
- 29       Intensive Care Unit: A qualitative study. *Intensive Crit Care Nurs* 2021;66:103039.
- 30 42. Soderberg A, Karlsson V, Ahlberg BM, et al. From fear to fight: Patients experiences of early
- 31       mobilization in intensive care. A qualitative interview study. *Physiother Theory Pract* 2020.
- 32       <https://www.tandfonline.com/doi/full/10.1080/09593985.2020.1799460> (accessed 12 July
- 33       2021).
- 34 43. Corner EJ, Murray EJ, Brett SJ. Qualitative, grounded theory exploration of patients' experience
- 35       of early mobilisation, rehabilitation and recovery after critical illness. *BMJ Open*
- 36       2019;9:e026348.
- 37 44. D'Lima DM, Murray EJ, Brett SJ. Perceptions of Risk and Safety in the ICU: A Qualitative Study of
- 38       Cognitive Processes Relating to Staffing. *Crit Care Med* 2018;46:60-70.
- 39 45. Laerkner E, Egerod I, Olesen F, et al. Negotiated mobilisation: An ethnographic exploration of
- 40       nurse-patient interactions in an intensive care unit. *J Clin Nurs* 2019;28:2329-39.
- 41 46. Skivington K, Matthews L, Simpson SA, et al. A new framework for developing and evaluating
- 42       complex interventions: update of Medical Research Council guidance. *BMJ* 2021;374:n2061.
- 43 47. Woodbridge HR, Norton C, Jones M, et al. EP.076, Clinician and patient perceptions of the
- 44       barriers and facilitators of mobilisation of intensive care patients in a UK NHS Trust.
- 45       Conference abstract. *J Intensive Care Soc* 2019;20:59.
- 46 48. Woodbridge HR, Alexander CM, Jones M, et al. Exploring the barriers to early physical
- 47       rehabilitation and investigating its safety in critically ill patients receiving vasoactive drugs.
- 48       Rising Star - ICS Gold Medal. Conference abstract. *Journal of the Intensive Care Society*
- 49       2022;23:199.
- 50 49. Woodbridge HR, Norton C, Alexander CM, et al. Exploring clinician's perceptions about the
- 51       barriers and facilitators of early mobilisation of patients on intensive care. Conference
- 52       abstract. *Physiotherapy* 2019;105:e119-e20.
- 53
- 54
- 55
- 56
- 57
- 58
- 59
- 60

### Consolidated criteria for reporting qualitative research checklist

Adapted from: TONG, A., SAINSBURY, P. & CRAIG, J. 2007. Consolidated criteria for reporting qualitative research (COREQ): a 32-item checklist for interviews and focus groups. *Int J Qual Health Care*, 19, 349-57.

| Topic                                          | Item no. | Guide questions/ descriptions                                                                                                                            | Reported on page no. |
|------------------------------------------------|----------|----------------------------------------------------------------------------------------------------------------------------------------------------------|----------------------|
| <b>Domain 1: Research team and reflexivity</b> |          |                                                                                                                                                          |                      |
| Personal Characteristics                       |          |                                                                                                                                                          |                      |
| Interviewer/facilitator                        | 1        | Which author/s conducted the interview or focus group?                                                                                                   | 6                    |
| Credentials                                    | 2        | What were the researcher's credentials? E.g. PhD, MD                                                                                                     | 6                    |
| Occupation                                     | 3        | What was their occupation at the time of the study?                                                                                                      | 6                    |
| Gender                                         | 4        | Was the researcher male or female?                                                                                                                       | 6                    |
| Experience and training                        | 5        | What experience or training did the researcher have?                                                                                                     | 6                    |
| Relationship with participants                 |          |                                                                                                                                                          |                      |
| Relationship established                       | 6        | Was a relationship established prior to study commencement?                                                                                              | 6                    |
| Participant knowledge of the interviewer       | 7        | What did the participants know about the researcher? e.g. personal goals, reasons for doing the research                                                 | 6                    |
| Interviewer characteristics                    | 8        | What characteristics were reported about the interviewer/facilitator? e.g. Bias, assumptions, reasons and interests in the research topic                | 6                    |
| <b>Domain 2: study design</b>                  |          |                                                                                                                                                          |                      |
| Theoretical framework                          |          |                                                                                                                                                          |                      |
| Methodological orientation and Theory          | 9        | What methodological orientation was stated to underpin the study? e.g. grounded theory, discourse analysis, ethnography, phenomenology, content analysis | 4                    |
| Participant selection                          |          |                                                                                                                                                          |                      |
| Sampling                                       | 10       | How were participants selected? e.g. purposive, convenience, consecutive, snowball                                                                       | 5                    |
| Method of approach                             | 11       | How were participants approached? e.g. face-to-face, telephone, mail, email                                                                              | 5                    |
| Sample size                                    | 12       | How many participants were in the study?                                                                                                                 | 7                    |
| Non-participation                              | 13       | How many people refused to participate or dropped out? Reasons?                                                                                          | 7                    |
| Setting                                        |          |                                                                                                                                                          |                      |
| Setting of data collection                     | 14       | Where was the data collected? e.g. home, clinic, workplace                                                                                               | 5                    |
| Presence of non-participants                   | 15       | Was anyone else present besides the participants and researchers?                                                                                        | 5                    |
| Description of sample                          | 16       | What are the important characteristics of the sample? e.g. demographic data, date                                                                        | 8-9                  |
| Data collection                                |          |                                                                                                                                                          |                      |

|                                        |    |                                                                                                                                   |                               |
|----------------------------------------|----|-----------------------------------------------------------------------------------------------------------------------------------|-------------------------------|
| Interview guide                        | 17 | Were questions, prompts, guides provided by the authors? Was it pilot tested?                                                     | 5                             |
| Repeat interviews                      | 18 | Were repeat interviews carried out? If yes, how many?                                                                             | 5                             |
| Audio/visual recording                 | 19 | Did the research use audio or visual recording to collect the data?                                                               | 6                             |
| Field notes                            | 20 | Were field notes made during and/or after the interview or focus group?                                                           | 6                             |
| Duration                               | 21 | What was the duration of the interviews or focus group?                                                                           | 7                             |
| Data saturation                        | 22 | Was data saturation discussed?                                                                                                    | 5                             |
| Transcripts returned                   | 23 | Were transcripts returned to participants for comment and/or correction?                                                          | 6                             |
| <b>Domain 3: analysis and findings</b> |    |                                                                                                                                   |                               |
| Data analysis                          |    |                                                                                                                                   |                               |
| Number of data coders                  | 24 | How many data coders coded the data?                                                                                              | 6                             |
| Description of the coding tree         | 25 | Did authors provide a description of the coding tree?                                                                             | Supplementary material        |
| Derivation of themes                   | 26 | Were themes identified in advance or derived from the data?                                                                       | 6                             |
| Software                               | 27 | What software, if applicable, was used to manage the data?                                                                        | 6                             |
| Participant checking                   | 28 | Did participants provide feedback on the findings?                                                                                | 5-6                           |
| Reporting                              |    |                                                                                                                                   |                               |
| Quotations presented                   | 29 | Were participant quotations presented to illustrate the themes / findings? Was each quotation identified? e.g. participant number | 10-16, supplementary material |
| Data and findings consistent           | 30 | Was there consistency between the data presented and the findings?                                                                | 10-16, supplementary material |
| Clarity of major themes                | 31 | Were major themes clearly presented in the findings?                                                                              | 10-16, supplementary material |
| Clarity of minor themes                | 32 | Is there a description of diverse cases or discussion of minor themes?                                                            | 10-16                         |

**Supplemental file 2**

1  
2  
3  
4  
5  
6  
7 1. Patient / relative / carer topic guide.  
8  
9

10  
11  
12  
13 2. Initial thematic framework  
14  
15  
16  
17

18  
19 3. Table with summary of themes, sub-categories and verbatim quotes with participant numbers  
20  
21  
22  
23  
24  
25  
26  
27  
28  
29  
30  
31  
32  
33  
34  
35  
36  
37  
38  
39  
40  
41  
42  
43  
44  
45  
46  
47  
48  
49  
50  
51  
52  
53  
54  
55  
56  
57  
58  
59  
60

## Interview topic guide: Patient representative

### Introduction:

- We value your opinions/what you think about these questions; there's not necessarily a right or wrong answer; it's not a test.

### Examples of general probes that may be used

- Tell me more about that.
- Why do you think that?
- Have you got any examples?

If unable to answer open question:

- Some people have said this ... [e.g. a known barrier from the literature if not already mentioned – see below for specific examples] ...what do you think?

If participant unable to define early mobilisation:

- We are defining early mobilisation as something the patient does with 'their own muscle strength and control' including activities such as:
  - Moving in bed
  - Exercises
  - Sitting on the edge of the bed,
  - Standing
  - Marching on the spot,
  - Transferring from bed to chair
  - Walking...

...all whilst patients are on intensive care.

## Interview questions

### General questions:

1. Please tell me about your experience on the ICU.
  
2. Please tell me about physiotherapy and mobilisation (moving around and getting up and out of bed) on the ICU.
  - a. What you would think of as early mobilisation?
  - b. What early mobilisation did you do? How often did you do it?
  - c. How was it decided that it was the right time for you to start mobilising on the ICU?
  
3. Do you think that early mobilisation was carried out enough?

### Focused questions:

4. When you were asked if you wanted to mobilise, did you have any concerns over risks or problems that might occur?  
*Potential question-specific prompts: not being well enough; fall; lines and drains/breathing tube falling out.*

5. Was there anything that stopped or delayed you from mobilising on the ICU?

*Potential question-specific prompts: Feeling too unwell; lines and tubes; not enough staff.*

6. What kind of things stopped mobilisation from happening more often on the ICU you were on?

1  
2  
3  
4  
5  
6  
7  
8  
9  
10  
11  
12  
13  
14  
15  
16  
17  
18  
19  
20  
21  
22  
23  
24  
25  
26  
27  
28  
29  
30  
31  
32  
33  
34  
35  
36  
37  
38  
39  
40  
41  
42  
43  
44  
45  
46  
47  
48  
49  
50  
51  
52  
53  
54  
55  
56  
57  
58  
59  
60

*Potential question-specific prompts: Not a priority; team did not work together; team did not have enough teaching.*

7. Why do you think the staff on you ICU wanted you to mobilise and what do you think the benefits were?

*Example of potential question-specific prompts: Physical benefits; leave ICU sooner, prevent long-term complications.*

8. In your experience, what things helped you to mobilise on the ICU?

*Potential question-specific prompts: Different professions working together; feeling well.*

9. What kind of things do you think could be improved or changed to help mobilisation to happen more often on your ICU and to overcome some of the problems you mentioned earlier?

*Potential question-specific prompts: Better team communication; staff getting more teaching.*

10. This question will explore other areas that previous interviews have brought up as important: e.g. other people have mentioned this... what do you think?

11. Is there anything else you'd like to say about what stops early mobilisation on the ICU and what could make it happen more often?

## Initial thematic framework.

### **BARRIERS**

#### **1. Perceived risk of mobilising certain patients [SAFETY/RISK]**

- 1.1 Airway and attachments
- 1.2 Patient instability
- 1.3 Patient type
- 1.4 Patient cognitive state
- 1.5 Patient medical status
- 1.6 Clinicians' perception of readiness to mobilise
- 1.7 Other

#### **2 Patient's or their family member's reluctance for mobilisation**

- 2.1 Clinician opinion of patient's or their family member's reluctance for mobilisation
- 2.2 Patients not feeling ready or motivated for mobilisation
- 2.3 Poor communication from clinicians
- 2.4 Aspects of the ICU environment not promoting mobilisation to patients
- 2.5 Other

#### **3 Team working and unit culture/staff experience/ resources**

- 3.1 Culture/Lesser priority
- 3.2 Roles and responsibilities
- 3.3 Lack of leadership
- 3.4 Staff experience
- 3.5 Lack of knowledge
- 3.6 Lack of resources
- 3.7 Logistics/ Other interventions
- 3.8 Nurse environment e.g. HDU/toilet
- 3.9 Other

### **FACILITATORS**

#### **4 Practical changes to how mobilisation was carried out.**

- 4.1 Patient and family engagement
- 4.2 Mob treatment specific/functional rehabilitation
- 4.3 Use of protocols to facilitate clinical implementation of mobilisation
- 4.4 Patient opinion on how clinicians should communicate with them.
- 4.5 Specific patient motivators



1 4.6 Equipment/environment  
2

3 4.7 Other changes/optimal practice  
4  
5  
6

7 **5. Improvements in team working and culture/clinician specific**

8 5.1 Leadership

9 5.2 Team Communication

10 5.3 Experienced staff

11 5.4 Improved staffing/resources

12 5.5 Other team working

13 5.6 Prioritise

14 5.7 Education

15 5.8 Other culture change  
16  
17  
18  
19

20  
21 **6. Patient characteristics that made it easier to mobilise**

22 6.1 Pre-morbid/general characteristics status

23 6.2 Acute/admission-related status

24 6.3 Other  
25  
26  
27

28 **7. Risks, benefits and other**

29 7.1 Risks

30 7.2 Benefits

31 7.3 Other/irrelevant  
32  
33  
34  
35  
36  
37  
38  
39  
40  
41  
42  
43  
44  
45  
46  
47  
48  
49  
50  
51  
52  
53  
54  
55  
56  
57  
58  
59  
60

1  
2  
3  
4  
5  
6  
7  
8  
9  
10  
11  
12  
13  
14  
15  
16  
17  
18  
19  
20  
21  
22  
23  
24  
25  
26  
27  
28  
29  
30  
31  
32  
33  
34  
35  
36  
37  
38  
39  
40  
41  
42  
43  
44  
45  
46

| <b>Table: Summary of themes and sub-categories</b> |                                                               |                     |                                                                                                                                                                                                                                                                                                                                                                                                                  |
|----------------------------------------------------|---------------------------------------------------------------|---------------------|------------------------------------------------------------------------------------------------------------------------------------------------------------------------------------------------------------------------------------------------------------------------------------------------------------------------------------------------------------------------------------------------------------------|
| <b>Themes</b>                                      | <b>Sub-categories</b>                                         | <b>Quote number</b> | <b>Participant quote</b>                                                                                                                                                                                                                                                                                                                                                                                         |
| 1. Safety and physiological concerns               | 1.1 Airway, lines and attachments                             | 1                   | <i>"I can't think who, they said an intensive care patient looks like little spiders in a web, and I agree with it. Like literally they have got tubes and attachments out everywhere." (Therapist 1)</i>                                                                                                                                                                                                        |
|                                                    | 1.2 Particular patient groups                                 | 2                   | <i>"...the types of patients we have have multiple and complex injuries, they're not straightforward patients to mobilise anyway..." (Therapist 3)</i>                                                                                                                                                                                                                                                           |
|                                                    | 1.3 Physiological instability or dependence on organ support  | 3                   | <i>"...it's mainly blood pressure related for me, or their resp[iratory] rate. If I don't think they're going to tolerate mobilising, and if it's going to cause more harm than good." (Therapist 2)</i>                                                                                                                                                                                                         |
|                                                    |                                                               | 4                   | <i>"So anybody who's on an inotrope vasopressor is, as far as I'm concerned, not safe to be mobilised... they're more likely to have a postural hypertension that would result in injury to them." (Doctor 2)</i>                                                                                                                                                                                                |
|                                                    |                                                               | 5                   | <i>"...whilst in itself [vasoactive drugs are] often not a reason to prevent ongoing rehab especially in junior staff it's a significant source of anxiety of doubling or trebling the dose of a medicine to keep your blood pressure up, without some form of kind of very clear guidance and encouragement that this is okay and it will return to normal following [rehabilitation] treatment." (Nurse 5)</i> |
|                                                    | 1.4 Patient's ability to actively participate                 | 6                   | <i>"And after that incident I think that was the first time I actually cried, because it hit me that "Yes, the nurses are right, I am not able to just get up and move like I would if I had been healthy," you know, so that was very traumatic for me..." (Patient 11).</i>                                                                                                                                    |
|                                                    |                                                               | 7                   | <i>"I think I would have felt very vulnerable anyhow, [be]cause suddenly you are just weak as a baby." (Patient 7)</i>                                                                                                                                                                                                                                                                                           |
|                                                    |                                                               | 8                   | <i>"Their cognitive state is a massive thing as well. How alert are they if they've only just been woken up from sedation or if they've had a neurological event or, you know, whatever reason, that could affect their cognition." (Therapist 6)</i>                                                                                                                                                            |
|                                                    | 1.5 Clinician perception of readiness to begin rehabilitation | 9                   | <i>"...the perception, [clinicians] might think that, because this patient is dependent on a particular type of organ support, this patient is not suitable for mobilisation. So these boundaries and barriers needs to be broken." (Doctor 3)</i>                                                                                                                                                               |
|                                                    |                                                               | 10                  | <i>"I think it's probably the fear of the unwell patient, you know, we, they're in ITU therefore they must be the most unwell people in the hospital. And I think it's that kind of mentality and the fact we attach them to fifteen hundred things..." (Therapist 7)</i>                                                                                                                                        |

1  
2  
3  
4  
5  
6  
7  
8  
9  
10  
11  
12  
13  
14  
15  
16  
17  
18  
19  
20  
21  
22  
23  
24  
25  
26  
27  
28  
29  
30  
31  
32  
33  
34  
35  
36  
37  
38  
39  
40  
41  
42  
43  
44  
45  
46

|                                                 |                                                         |                                                                                                                                                                                                                                                                                                                |                                                                                                                                                                                                                                                                                                                                                            |
|-------------------------------------------------|---------------------------------------------------------|----------------------------------------------------------------------------------------------------------------------------------------------------------------------------------------------------------------------------------------------------------------------------------------------------------------|------------------------------------------------------------------------------------------------------------------------------------------------------------------------------------------------------------------------------------------------------------------------------------------------------------------------------------------------------------|
|                                                 |                                                         | 11                                                                                                                                                                                                                                                                                                             | <i>"...happy to cause no harm, or kind of, and no perceived harm by not mobilising someone but actively getting up and causing harm is a, always going to be a significant anxiety for staff..." (Nurse 5)</i>                                                                                                                                             |
|                                                 |                                                         | 12                                                                                                                                                                                                                                                                                                             | <i>"We love keeping the numbers normal, we love the sense of security that we maintain as normal physiology as we can, so that is why, a junior nurse would be more worried if she gets any change in the patient's state after mobilisation..." (Doctor 1)</i>                                                                                            |
|                                                 |                                                         | 13                                                                                                                                                                                                                                                                                                             | <i>"...intensive care doctors and nurses may also be quite, well, I shouldn't say "quite" but there is a part in us that is controlling the situation and so, you know, trying to mobilise the patient may also be a bit of a paradigm shift in our own mind of, you know, this complete control over the situation and over this patient." (Doctor 4)</i> |
|                                                 |                                                         | 14                                                                                                                                                                                                                                                                                                             | <i>"...so we kind of reset our expectations about normality and that is doing some sort of exercise when they ambulate because it is – it is to a critically ill patient it is an exercise, that we may see some events happen and as long as it is the range of acceptance, we can just modify our targets, and continue to mobilise." (Doctor 1)</i>     |
| 2. Patient participation and engagement         | 2.1 Patient reluctance to participate in rehabilitation | 15                                                                                                                                                                                                                                                                                                             | <i>"...well I'm in ICU... you're having intensive care, don't rock the boat by making things worse by trying to get out of bed." (Patient 8)</i>                                                                                                                                                                                                           |
|                                                 |                                                         | 16                                                                                                                                                                                                                                                                                                             | <i>"...there were times when I simply didn't want to do it... Depression, ... lack of energy, lack of spirits really ..." (Patient 7)</i>                                                                                                                                                                                                                  |
|                                                 | 2.2 Communication between patients and clinicians       | 17                                                                                                                                                                                                                                                                                                             | <i>"I would say to any nurse or any staff working in ICU... keep up that reassurance with patients because it's quite a scary experience..." (Patient 8)</i>                                                                                                                                                                                               |
|                                                 |                                                         | 18                                                                                                                                                                                                                                                                                                             | <i>"[The consultant] pushed me beyond what I mentally thought was physically possible. I didn't believe that I could do that and of course, perhaps it's the nature of my personality, but I responded to that. Others may not have responded to that, I can't say." (Patient 3)</i>                                                                       |
|                                                 | 2.3 Patient engagement in planning rehabilitation       | 19                                                                                                                                                                                                                                                                                                             | <i>"So, alongside that, we've also made like goal setting sheets that can go up by the patient's bed, so then when they sit up, when they sit upright in bed, they can see them. I draw a smiley face when they've completed one..." (Therapist 2)</i>                                                                                                     |
| 2.4 Including activities meaningful to patients | 20                                                      | <i>"Looking at therapy in a slightly different way and finding an activity that's meaningful to [patients], whether that's personal care or leisure activities, and through that encouraging them to... engage in that activity and then helping them to see the therapeutic value of that." (Therapist 4)</i> |                                                                                                                                                                                                                                                                                                                                                            |
| 2.5 Identify key patient motivators             | 21                                                      | <i>"...if they can see what's in it for them, that they're gaining in dignity and all of that, they might cooperate more." (Relative 2)</i>                                                                                                                                                                    |                                                                                                                                                                                                                                                                                                                                                            |

|                                       |                                                   |                                                                                                                                                                                                                                                                                                                                                          |                                                                                                                                                                                                                                                                                                                                                                                                                        |
|---------------------------------------|---------------------------------------------------|----------------------------------------------------------------------------------------------------------------------------------------------------------------------------------------------------------------------------------------------------------------------------------------------------------------------------------------------------------|------------------------------------------------------------------------------------------------------------------------------------------------------------------------------------------------------------------------------------------------------------------------------------------------------------------------------------------------------------------------------------------------------------------------|
|                                       | 2.6 The role of family                            | 22                                                                                                                                                                                                                                                                                                                                                       | <i>"I remember the first time I took a few steps, the nurse said to me, "Well we'll do it with your husband," so my husband stood on one side and said, "We'll go for a walk with your husband," ... So it was most amazing feeling ever, you know? So everything, kind of in my head everything shut down; the nurse went away, the ward went away, it was just me and my husband going for a walk." (Patient 11)</i> |
| 3. Clinician experience and knowledge | 3.1 Amount of experience and support              | 23                                                                                                                                                                                                                                                                                                                                                       | <i>"I've had instances where it's mostly been junior people and it's terrifying. But for someone then to have a senior position helping you, that's so much better." (Nurse 2)</i>                                                                                                                                                                                                                                     |
|                                       | 3.2 Lack of training, knowledge and skills        | 24                                                                                                                                                                                                                                                                                                                                                       | <i>"It doesn't happen because... we are not aware enough yet how important it is, or how much difference it could make, so it's not embedded in our thinking and in our behaviour well..." (Doctor 4)</i>                                                                                                                                                                                                              |
|                                       | 3.3 Interdisciplinary team education and training | 25                                                                                                                                                                                                                                                                                                                                                       | <i>"The education as well is important because you need to get people to understand what they're doing and to value it, so that they do it with passion and with skill." (Doctor 1)</i>                                                                                                                                                                                                                                |
| 4. Teamwork                           | 4.1 Team culture and attitudes                    | 26                                                                                                                                                                                                                                                                                                                                                       | <i>"But a lot of it's just to do with the attitude of the individual staff member, how proactive they are and how much they believe in mobilisation as a kind of key thing" (Nurse 5)</i>                                                                                                                                                                                                                              |
|                                       | 4.2 Perception of roles and responsibilities      | 27                                                                                                                                                                                                                                                                                                                                                       | <i>"...I think the consultant's role is very important and it doesn't just include saying, "Mobilise the patient". It includes making sure that mobilisation happens and making sure that the team are, like every single member of the team is comfortable and understands the decision, and the risks related to it and understands that I am there to back them up if something happens." (Doctor 1)</i>            |
|                                       |                                                   | 28                                                                                                                                                                                                                                                                                                                                                       | <i>"I've found that it's taken a long time for me to be accepted and for them to actually accept my opinion might be right..." (Therapist 2)</i>                                                                                                                                                                                                                                                                       |
|                                       |                                                   | 29                                                                                                                                                                                                                                                                                                                                                       | <i>"I always felt like it was, it was very much seen it was the physio job to do anything related to moving the patient so even getting them out of bed." (Therapist 7)</i>                                                                                                                                                                                                                                            |
|                                       |                                                   | 30                                                                                                                                                                                                                                                                                                                                                       | <i>"...good teamwork is really helpful, and actually a really good symbiotic relationship between the nursing staff and the therapy staff is really key." (Therapist 4)</i>                                                                                                                                                                                                                                            |
|                                       | 4.3 Definition and delivery of rehabilitation     | 31                                                                                                                                                                                                                                                                                                                                                       | <i>"...mobilisation for me in ITU is hoisting somebody into a chair." (Nurse 4)</i>                                                                                                                                                                                                                                                                                                                                    |
| 32                                    |                                                   | <i>"...rehabilitation is not, you know, 20 minutes with the physio or the OT every day. Really good rehabilitation is a 24 hour approach, and that – part of that is positioning a patient in bed. Part of that is ensuring the patient gets the right nutrition as well as looking at the actual physical things that they're doing." (Therapist 4)</i> |                                                                                                                                                                                                                                                                                                                                                                                                                        |
| 33                                    |                                                   | <i>"...a different mentality within intensive care and to think, well actually, you know, we need to begin the rehab process all together from day one, and if a patient can be encouraged to do something they should be given the time and the opportunity to do that." (Therapist 4)</i>                                                              |                                                                                                                                                                                                                                                                                                                                                                                                                        |

|                                                           |                                   |    |                                                                                                                                                                                                                                                                                                                                                                            |
|-----------------------------------------------------------|-----------------------------------|----|----------------------------------------------------------------------------------------------------------------------------------------------------------------------------------------------------------------------------------------------------------------------------------------------------------------------------------------------------------------------------|
|                                                           | 4.4 Staffing and logistics        | 34 | <i>"...you start breaks at 9.30, 10.00. You finish the breaks about 12.00,1.00, so then it's not until the afternoon that people are free to help." (Nurse 2)</i>                                                                                                                                                                                                          |
| 5. Equipment and environment                              | 5.1 Rehabilitation equipment      | 35 | <i>"...equipment wise. You know, it's the age old problem isn't it, more of it, better ways to fix it, more money, so we've got the equipment, you know, got backup hoists." (Therapist 7)</i>                                                                                                                                                                             |
|                                                           | 5.2 ICU environment               | 36 | <i>"there's just something about the environment which makes you think that you need to stay in the bed and that you shouldn't be moving around... whereas on a general ward, you don't want to be in the bed, you want to get out." (Patient 8)</i>                                                                                                                       |
|                                                           |                                   | 37 | <i>"...you can see some bright lights and monitors, you can hear monitors going off, but you don't have the, "Crash, bang, wallops!" that you get in a general ward... but it's a capsule and a bubble, it's a weird feeling... "People think it's like being in a spaceship" and I thought, "That's such a good description" and that's how it did feel." (Patient 8)</i> |
| 6. Risks and benefits of rehabilitation on intensive care | 6.1 Clinician perception of risks | 38 | <i>"Falls, removal of lines and tubes and then causing bleeding, vasovagal episodes, it's actually a risky thing to mobilise an ITU patient, anything can go wrong..." (Nurse 3)</i>                                                                                                                                                                                       |
|                                                           |                                   | 39 | <i>"I like mobilising patients. The more attachments the better... Because I like the challenge!" (Therapist 2)</i>                                                                                                                                                                                                                                                        |
|                                                           | 6.2 Patient perception of risks   | 40 | <i>"I never felt scared, I felt that the physiotherapist that was orchestrating the movement was sort of holding on to me to begin with and I never felt I was going to fall down..." (Patient 1)</i>                                                                                                                                                                      |
|                                                           | 6.3 Physical benefits             | 41 | <i>"It might help their movement and I feel the more they mobilise the more their muscles are good. The more you make them sit out of the bed and stand they can stand on their feet better." (Nurse 1)</i>                                                                                                                                                                |
|                                                           | 6.4 Psychological benefits        | 42 | <i>"...the important thing is you sense that you're not just lying there waiting to die. ...so you are... you are... coming back to being a human being that wants to live." (Patient 7)</i>                                                                                                                                                                               |

# BMJ Open

## Clinician and patient perspectives on the barriers and facilitators to physical rehabilitation in intensive care: a qualitative interview study

|                                 |                                                                                                                                                                                                                                                                                                                                                                                                                                                                                                                                                                                                                                                                       |
|---------------------------------|-----------------------------------------------------------------------------------------------------------------------------------------------------------------------------------------------------------------------------------------------------------------------------------------------------------------------------------------------------------------------------------------------------------------------------------------------------------------------------------------------------------------------------------------------------------------------------------------------------------------------------------------------------------------------|
| Journal:                        | <i>BMJ Open</i>                                                                                                                                                                                                                                                                                                                                                                                                                                                                                                                                                                                                                                                       |
| Manuscript ID                   | bmjopen-2023-073061.R1                                                                                                                                                                                                                                                                                                                                                                                                                                                                                                                                                                                                                                                |
| Article Type:                   | Original research                                                                                                                                                                                                                                                                                                                                                                                                                                                                                                                                                                                                                                                     |
| Date Submitted by the Author:   | 05-Sep-2023                                                                                                                                                                                                                                                                                                                                                                                                                                                                                                                                                                                                                                                           |
| Complete List of Authors:       | Woodbridge, Huw; Imperial College Healthcare NHS Trust; Imperial College London, Department of Surgery and Cancer<br>Norton, Christine; Kings College London, Florence Nightingale Faculty of Nursing, Midwifery and Palliative Care<br>Jones, Mandy ; Brunel University London<br>Brett, Stephen; Imperial College Healthcare NHS Trust, Anaesthetics and Intensive Care; Imperial College London, Department of Surgery and Cancer<br>Alexander, Caroline; Imperial College Healthcare NHS Trust, Therapies; Imperial College London, MSk Labs<br>Gordon, Anthony; Imperial College London, Department of Surgery and Cancer; Imperial College Healthcare NHS Trust |
| <b>Primary Subject Heading</b>: | Intensive care                                                                                                                                                                                                                                                                                                                                                                                                                                                                                                                                                                                                                                                        |
| Secondary Subject Heading:      | Rehabilitation medicine, Qualitative research                                                                                                                                                                                                                                                                                                                                                                                                                                                                                                                                                                                                                         |
| Keywords:                       | Adult intensive & critical care < INTENSIVE & CRITICAL CARE, QUALITATIVE RESEARCH, REHABILITATION MEDICINE                                                                                                                                                                                                                                                                                                                                                                                                                                                                                                                                                            |
|                                 |                                                                                                                                                                                                                                                                                                                                                                                                                                                                                                                                                                                                                                                                       |

SCHOLARONE™  
Manuscripts



I, the Submitting Author has the right to grant and does grant on behalf of all authors of the Work (as defined in the below author licence), an exclusive licence and/or a non-exclusive licence for contributions from authors who are: i) UK Crown employees; ii) where BMJ has agreed a CC-BY licence shall apply, and/or iii) in accordance with the terms applicable for US Federal Government officers or employees acting as part of their official duties; on a worldwide, perpetual, irrevocable, royalty-free basis to BMJ Publishing Group Ltd ("BMJ") its licensees and where the relevant Journal is co-owned by BMJ to the co-owners of the Journal, to publish the Work in this journal and any other BMJ products and to exploit all rights, as set out in our [licence](#).

The Submitting Author accepts and understands that any supply made under these terms is made by BMJ to the Submitting Author unless you are acting as an employee on behalf of your employer or a postgraduate student of an affiliated institution which is paying any applicable article publishing charge ("APC") for Open Access articles. Where the Submitting Author wishes to make the Work available on an Open Access basis (and intends to pay the relevant APC), the terms of reuse of such Open Access shall be governed by a Creative Commons licence – details of these licences and which [Creative Commons](#) licence will apply to this Work are set out in our licence referred to above.

Other than as permitted in any relevant BMJ Author's Self Archiving Policies, I confirm this Work has not been accepted for publication elsewhere, is not being considered for publication elsewhere and does not duplicate material already published. I confirm all authors consent to publication of this Work and authorise the granting of this licence.

1  
2  
3 **Clinician and patient perspectives on the barriers and facilitators to physical**  
4 **rehabilitation in intensive care: a qualitative interview study.**  
5  
6  
7  
8  
9

10  
11 **Authors**  
12

13  
14 Huw R. Woodbridge\*

- 15
  - 16 • Imperial College Healthcare NHS Trust, London, UK; Imperial College London, London, UK.

17  
18 Christine Norton

- 19
  - 20 • King's College London, London, UK.

21  
22 Mandy Jones

- 23
  - 24 • Brunel University London, London, UK.

25  
26 Stephen J. Brett

- 27
  - 28 • Imperial College Healthcare NHS Trust, London, UK; Imperial College London, London, UK.

29  
30 Caroline M. Alexander

- 31
  - 32 • Imperial College Healthcare NHS Trust, London, UK; Imperial College London, London, UK.

33  
34 Anthony C. Gordon

- 35
  - 36 • Imperial College London, London, UK; Imperial College Healthcare NHS Trust, London, UK.

37  
38 \*Corresponding author: Physiotherapy Department, St Mary's Hospital, Praed Street,  
39 London W2 1NY. Email: [h.woodbridge@imperial.ac.uk](mailto:h.woodbridge@imperial.ac.uk) Telephone: 0203 312 1794.  
40  
41  
42  
43  
44  
45  
46

47 **Keywords:** Adult intensive & critical care; qualitative research; rehabilitation medicine.  
48

49 **Word count:** 5718  
50  
51  
52  
53  
54  
55  
56  
57  
58  
59  
60



## Abstract

### Objectives

To explore patient, relative/carer and clinician perceptions of barriers to early physical rehabilitation in intensive care units (ICU) within an associated group of hospitals in the United Kingdom (UK) and how they can be overcome.

### Design

Qualitative study using semi-structured interviews and thematic framework analysis.

### Setting

Four ICUs over three hospital sites in London, UK.

### Participants

Former ICU patients or their relatives/carers with personal experience of ICU rehabilitation. ICU clinicians, including doctors, nurses, physiotherapists and occupational therapists, involved in the delivery of physical rehabilitation or decisions over its initiation.

### Interventions

Nil

### Primary and secondary outcomes measures

Views and experiences on the barriers and facilitators to ICU physical rehabilitation.

### Results

Interviews were carried out with 11 former patients, 3 family members and 16 clinicians. The themes generated related to: safety and physiological concerns; patient participation and engagement; clinician experience and knowledge; teamwork; equipment and environment; and risks and benefits of rehabilitation in intensive care. The overarching theme for overcoming barriers was a change in working model from ICU clinicians having separate responsibilities (a multidisciplinary approach) to one where all parties have a

1  
2  
3 shared aim of providing patient-centred ICU physical rehabilitation (an interdisciplinary  
4 approach).  
5  
6

### 7 Conclusions

8  
9  
10 The results have revealed barriers that can be modified to improve rehabilitation delivery in  
11 an ICU. Interdisciplinary working could overcome many of these barriers to optimise  
12 recovery from critical illness.  
13  
14  
15  
16  
17

### 18 **Strengths and limitations of this study**

- 19  
20  
21  
22  
23  
24  
25  
26  
27  
28  
29  
30  
31  
32  
33  
34  
35  
36  
37  
38  
39  
40  
41  
42  
43  
44  
45  
46  
47
- This study explored a range of perspectives on the barriers to ICU rehabilitation (including clinicians and services users), thus eliciting in depth information to reveal a breadth of experiences of barriers and facilitators.
  - Thematic framework analysis was used which enables a systematic approach to organising data, facilitating in-depth exploration of the range of views within themes and between participant groups.
  - Patient and family recall of their experiences may have been impacted by the time from intensive care admission to interview, however interviews took place at the first follow up opportunity to minimise this effect.
  - Efforts were made to gain a range of perspectives using purposive sampling; however, fewer family members or carers took part in this study than former ICU patients.

### 48 **Introduction**

49  
50 The importance of physical rehabilitation of critically ill patients has been recognised  
51 because of the prevalence of acute muscle weakness and wasting [1-3], and longer-term  
52 substantial physical disability measured in this patient group [2 4 5]. Physical rehabilitation  
53 consists of physical activity interventions (typically mobilising in or away from the bed) that  
54 are begun once a patient has reached physiological stability [6-8]. Beginning physical  
55 rehabilitation at an appropriate dose whilst patients are still in an intensive care unit (ICU)  
56  
57  
58  
59  
60

1  
2  
3 can improve physical function whilst in hospital and expedite discharge [9], although  
4 implementing rehabilitation at a higher dose is not necessarily beneficial [10]. However,  
5 when measured, there is concern that the actual amount of formal physical rehabilitation  
6 delivered and patient participation in exercise whilst in intensive care are low [11-17].  
7  
8  
9

10  
11 Studies have previously measured the barriers to implementing rehabilitation, the majority  
12 of which use a quantitative approach [18]. However, a qualitative approach is better-suited  
13 to exploring interpersonal relations [19] and therefore potential barriers relating to team  
14 working and patient interactions. Where a qualitative approach has been used, issues of  
15 communication and differences in opinion between clinicians [20-25] and difficulty in  
16 providing rehabilitation in an environment where demands on staff and patient time change  
17 quickly have been highlighted [23 26 27]. However, the lack of rehabilitation in intensive  
18 care continues despite this current understanding of the barriers. Importantly, there is a  
19 lack of in-depth knowledge of barriers in a United Kingdom (UK) setting, which includes  
20 views of multiple stakeholders such as ICU clinicians from different professions involved in  
21 implementing rehabilitation, as well as patients and family members [22 28-30].  
22  
23  
24  
25  
26  
27  
28  
29  
30

31  
32 The objective of this study therefore, was to explore service user (patients or their  
33 relatives/carers) and clinician perceptions of barriers to early physical rehabilitation in ICUs  
34 within an associated group of hospitals in the UK and how they can be overcome.  
35  
36  
37  
38  
39  
40

## 41 **Methods**

### 42 *Research design*

43  
44 A qualitative study using semi-structured interviews was conducted based on the approach  
45 recommended by the National Centre for Social Research. This is based upon critical realism  
46 and interpretivism using the framework approach to analysis [31]. Ethical approval was  
47 gained from the London – Bloomsbury Research Ethics Committee (17/LO/0362) and  
48 written, informed consent was gained from all participants. This study is reported in line  
49 with the consolidated criteria for reporting qualitative research [32] (supplemental file 1).  
50  
51  
52  
53  
54  
55  
56  
57  
58  
59  
60  
61  
62  
63  
64  
65  
66  
67  
68  
69  
70  
71  
72  
73  
74  
75  
76  
77  
78  
79  
80  
81  
82  
83  
84  
85  
86  
87  
88  
89  
90  
91  
92  
93  
94  
95  
96  
97  
98  
99  
100  
101  
102  
103  
104  
105  
106  
107  
108  
109  
110  
111  
112  
113  
114  
115  
116  
117  
118  
119  
120  
121  
122  
123  
124  
125  
126  
127  
128  
129  
130  
131  
132  
133  
134  
135  
136  
137  
138  
139  
140  
141  
142  
143  
144  
145  
146  
147  
148  
149  
150  
151  
152  
153  
154  
155  
156  
157  
158  
159  
160  
161  
162  
163  
164  
165  
166  
167  
168  
169  
170  
171  
172  
173  
174  
175  
176  
177  
178  
179  
180  
181  
182  
183  
184  
185  
186  
187  
188  
189  
190  
191  
192  
193  
194  
195  
196  
197  
198  
199  
200  
201  
202  
203  
204  
205  
206  
207  
208  
209  
210  
211  
212  
213  
214  
215  
216  
217  
218  
219  
220  
221  
222  
223  
224  
225  
226  
227  
228  
229  
230  
231  
232  
233  
234  
235  
236  
237  
238  
239  
240  
241  
242  
243  
244  
245  
246  
247  
248  
249  
250  
251  
252  
253  
254  
255  
256  
257  
258  
259  
260  
261  
262  
263  
264  
265  
266  
267  
268  
269  
270  
271  
272  
273  
274  
275  
276  
277  
278  
279  
280  
281  
282  
283  
284  
285  
286  
287  
288  
289  
290  
291  
292  
293  
294  
295  
296  
297  
298  
299  
300  
301  
302  
303  
304  
305  
306  
307  
308  
309  
310  
311  
312  
313  
314  
315  
316  
317  
318  
319  
320  
321  
322  
323  
324  
325  
326  
327  
328  
329  
330  
331  
332  
333  
334  
335  
336  
337  
338  
339  
340  
341  
342  
343  
344  
345  
346  
347  
348  
349  
350  
351  
352  
353  
354  
355  
356  
357  
358  
359  
360  
361  
362  
363  
364  
365  
366  
367  
368  
369  
370  
371  
372  
373  
374  
375  
376  
377  
378  
379  
380  
381  
382  
383  
384  
385  
386  
387  
388  
389  
390  
391  
392  
393  
394  
395  
396  
397  
398  
399  
400  
401  
402  
403  
404  
405  
406  
407  
408  
409  
410  
411  
412  
413  
414  
415  
416  
417  
418  
419  
420  
421  
422  
423  
424  
425  
426  
427  
428  
429  
430  
431  
432  
433  
434  
435  
436  
437  
438  
439  
440  
441  
442  
443  
444  
445  
446  
447  
448  
449  
450  
451  
452  
453  
454  
455  
456  
457  
458  
459  
460  
461  
462  
463  
464  
465  
466  
467  
468  
469  
470  
471  
472  
473  
474  
475  
476  
477  
478  
479  
480  
481  
482  
483  
484  
485  
486  
487  
488  
489  
490  
491  
492  
493  
494  
495  
496  
497  
498  
499  
500  
501  
502  
503  
504  
505  
506  
507  
508  
509  
510  
511  
512  
513  
514  
515  
516  
517  
518  
519  
520  
521  
522  
523  
524  
525  
526  
527  
528  
529  
530  
531  
532  
533  
534  
535  
536  
537  
538  
539  
540  
541  
542  
543  
544  
545  
546  
547  
548  
549  
550  
551  
552  
553  
554  
555  
556  
557  
558  
559  
560  
561  
562  
563  
564  
565  
566  
567  
568  
569  
570  
571  
572  
573  
574  
575  
576  
577  
578  
579  
580  
581  
582  
583  
584  
585  
586  
587  
588  
589  
590  
591  
592  
593  
594  
595  
596  
597  
598  
599  
600  
601  
602  
603  
604  
605  
606  
607  
608  
609  
610  
611  
612  
613  
614  
615  
616  
617  
618  
619  
620  
621  
622  
623  
624  
625  
626  
627  
628  
629  
630  
631  
632  
633  
634  
635  
636  
637  
638  
639  
640  
641  
642  
643  
644  
645  
646  
647  
648  
649  
650  
651  
652  
653  
654  
655  
656  
657  
658  
659  
660  
661  
662  
663  
664  
665  
666  
667  
668  
669  
670  
671  
672  
673  
674  
675  
676  
677  
678  
679  
680  
681  
682  
683  
684  
685  
686  
687  
688  
689  
690  
691  
692  
693  
694  
695  
696  
697  
698  
699  
700  
701  
702  
703  
704  
705  
706  
707  
708  
709  
710  
711  
712  
713  
714  
715  
716  
717  
718  
719  
720  
721  
722  
723  
724  
725  
726  
727  
728  
729  
730  
731  
732  
733  
734  
735  
736  
737  
738  
739  
740  
741  
742  
743  
744  
745  
746  
747  
748  
749  
750  
751  
752  
753  
754  
755  
756  
757  
758  
759  
760  
761  
762  
763  
764  
765  
766  
767  
768  
769  
770  
771  
772  
773  
774  
775  
776  
777  
778  
779  
780  
781  
782  
783  
784  
785  
786  
787  
788  
789  
790  
791  
792  
793  
794  
795  
796  
797  
798  
799  
800  
801  
802  
803  
804  
805  
806  
807  
808  
809  
810  
811  
812  
813  
814  
815  
816  
817  
818  
819  
820  
821  
822  
823  
824  
825  
826  
827  
828  
829  
830  
831  
832  
833  
834  
835  
836  
837  
838  
839  
840  
841  
842  
843  
844  
845  
846  
847  
848  
849  
850  
851  
852  
853  
854  
855  
856  
857  
858  
859  
860  
861  
862  
863  
864  
865  
866  
867  
868  
869  
870  
871  
872  
873  
874  
875  
876  
877  
878  
879  
880  
881  
882  
883  
884  
885  
886  
887  
888  
889  
890  
891  
892  
893  
894  
895  
896  
897  
898  
899  
900  
901  
902  
903  
904  
905  
906  
907  
908  
909  
910  
911  
912  
913  
914  
915  
916  
917  
918  
919  
920  
921  
922  
923  
924  
925  
926  
927  
928  
929  
930  
931  
932  
933  
934  
935  
936  
937  
938  
939  
940  
941  
942  
943  
944  
945  
946  
947  
948  
949  
950  
951  
952  
953  
954  
955  
956  
957  
958  
959  
960  
961  
962  
963  
964  
965  
966  
967  
968  
969  
970  
971  
972  
973  
974  
975  
976  
977  
978  
979  
980  
981  
982  
983  
984  
985  
986  
987  
988  
989  
990  
991  
992  
993  
994  
995  
996  
997  
998  
999  
1000

1  
2  
3 subject and methods experience (HRW, CN, CMA, ACG) and two patient representatives  
4 who were former ICU patients approached through a national patient support group.  
5  
6

### 7 *Setting and participants*

8  
9  
10 The study was based at a UK National Health Service (NHS) hospital trust in London, which  
11 has four ICUs for adult patients across three hospital sites, each of which has different  
12 referring specialities. Purposive sampling [33 34] was used to recruit a range of service users  
13 (former ICU patients and their family members/carers) and the hospital's ICU clinicians from  
14 the different ICU settings, from different professional groups with a range of experience  
15 levels.  
16  
17  
18  
19  
20

### 21 *Eligibility criteria and recruitment strategies*

22  
23  
24 Clinicians were included if they were doctors (senior trainees [registrars/fellows] or  
25 consultants), nurses, occupational therapists or physiotherapists with at least two months of  
26 ICU experience and who had experience of rehabilitation treatments or deciding when they  
27 should be initiated. Clinicians were approached via adverts in meetings, posted in staff areas  
28 or via general group or more targeted emails. Former ICU patients and family members  
29 were included if they had any personal experience of physical rehabilitation whilst in ICU.  
30  
31  
32  
33  
34  
35  
36  
37  
38  
39  
40  
41  
42  
43  
44  
45  
46  
47  
48  
49  
50  
51  
52  
53  
54  
55  
56  
57  
58  
59  
60

### *Data saturation*

Estimates were that 30 participants would be required to gain a sufficient range of  
perspectives, with sampling ending once apparent data saturation had been reached. Data  
saturation was defined a priori as when no new themes of barriers and facilitators were  
evident from interviews, as decided by the research steering group. During data collection,  
when the interviewer felt no new themes were being discussed, the latest version of the  
initial thematic framework was shown to the final clinician and patient participant as a  
sense check to see whether they could identify any additional themes that had been missed.  
Following this, the initial thematic framework was reviewed by clinical colleagues from all

1  
2  
3 four professional groups included in the study, as well as the research steering group  
4 members who were former ICU patients, to discuss if any obvious themes were missing.  
5  
6

### 7 *Topic guide development*

8  
9  
10 A semi-structured interview topic guide was developed (supplemental file 2), designed by  
11 the research steering group (which included the input of former ICU patients) and was  
12 formatted based on typical qualitative interview procedures [35-38]. It consisted of 11 main  
13 open questions that were designed to address different aspects of the research objective  
14 (such as barriers and risk), some of which were derived from previous studies[20 27 39]. The  
15 interview was piloted with both clinicians and former patients to ensure questions were  
16 clear and fit for purpose. No modifications were required to the topic guide in response to  
17 testing.  
18  
19  
20  
21  
22  
23  
24  
25

### 26 *Interview procedures*

27  
28 Interviews took place at the hospital site in person and only included the interviewer and  
29 the individual participant. Each participant took part in one semi-structured interview.  
30 Before the interview began, participants were asked for demographic data then the  
31 interview proceeded. The format of the interview was a conversation, where wording was  
32 not fixed and prompts were used to gain greater depth of understanding of participant  
33 views and experiences[35]. Participants were asked to define physical rehabilitation  
34 themselves, however, the study was designed based on rehabilitation consisting of  
35 mobilisation treatments ranging from exercises and movement in the bed, to mobilising out  
36 of bed and walking [8]. Participants were informed of this if they had difficulty defining  
37 rehabilitation or if their definition was markedly different from how the study  
38 conceptualised rehabilitation. Each interview was recorded and then transcribed verbatim.  
39 Transcripts were not returned to participants for review in line with current thinking about  
40 usefulness of this approach [40].  
41  
42  
43  
44  
45  
46  
47  
48  
49  
50  
51  
52

### 53 *Reflexivity*

54  
55 All interviews were carried out by one interviewer (HRW) who is a male physiotherapist,  
56 working full-time on the research study as part of work towards a doctorate, with training in  
57 qualitative research methods. The interviewer had previous clinical experience at several of  
58  
59  
60

1  
2  
3 the ICUs that were settings for this study, including working alongside some of the clinician  
4 participants, but not the patients or their relatives/carers. The researcher therefore had  
5 previous experiences of barriers and facilitators of rehabilitation in the study setting. These  
6 influences were taken into account using a reflexive diary before and after data collection,  
7 which was then considered during the analysis process.  
8  
9  
10  
11  
12

### 13 *Data analysis*

14  
15  
16 Thematic framework analysis [41 42] was used to produce themes based on the interview  
17 transcript data. This involves drawing up an initial list of themes that summarised all the  
18 interview data (supplemental file 2). Data were then arranged in a framework table which  
19 structured what each participant had said about each initial theme in an easily accessible  
20 form. This facilitated the production of a final set of themes and subthemes and comparison  
21 of how these vary between groups of participants. Analysis was facilitated by the use of  
22 NVivo 11 software (QSR International) and carried out by the first author (HRW). A second  
23 researcher (MJ) reviewed 10% of interview transcripts and confirmed that they matched the  
24 initial set of themes. At several stages during the analysis process, the research steering  
25 group met to review the data, discuss uncertainties over formation of themes and as a  
26 check on the process. Descriptive statistics were used to summarise demographic data using  
27 IBM SPSS Statistics 25. Continuous data were tested for normality using the Shapiro-Wilk  
28 test and non-normally distributed data described using median and interquartile range, and  
29 normally distributed data described using mean and standard deviation.  
30  
31  
32  
33  
34  
35  
36  
37  
38  
39  
40  
41  
42  
43  
44

### 45 *Patient and public involvement*

46  
47 Former ICU patients were members of the research steering group. These patient  
48 representatives edited the wording of recruitment materials and inputted into the design of  
49 the topic guide. They also assisted the interviewer (HRW) to practice interview technique  
50 and were involved in reviewing the initial thematic framework, as part of data saturation  
51 checks. These patient representatives did not participate or contribute data to the study  
52 itself.  
53  
54  
55  
56  
57  
58  
59  
60

## Results

Recruited participants included 16 clinicians, from a range of professions, with a range of experience in different settings (Table 1). Eleven former ICU patients and three family members/caregivers participated (Table 2), including substantial patient experience of ICU rehabilitation (mean patient participant length of ICU stay: 15 days, standard deviation  $\pm$  10.8 days). Initially, 53 potential participants expressed interest in taking part, of whom 30 were recruited before data saturation was achieved. Five declined or were not available for interview, three did not respond further after initial contact, data saturation was achieved before four were recruited and 11 were not recruited as others were chosen instead to gain a greater range of views, as per the purposive sampling strategy. Interviews lasted for a mean 43 minutes (standard deviation  $\pm$  11 minutes).

**Table 1: Clinician participant demographics**

|                                                                                                              | <b>Clinicians<br/>(N=16)</b> |
|--------------------------------------------------------------------------------------------------------------|------------------------------|
| Age, mean ( $\pm$ SD)                                                                                        | 34 (8.6)                     |
| Gender: female, n (%)                                                                                        | 12 (75)                      |
| Profession, n (%)                                                                                            |                              |
| Doctor                                                                                                       | 4 (25)                       |
| Nurse                                                                                                        | 5 (31)                       |
| Therapist (physiotherapist or occupational therapist)                                                        | 7 (44)                       |
| Seniority, n (%)                                                                                             |                              |
| Team leader                                                                                                  | 9 (56)                       |
| Senior clinician                                                                                             | 6 (38)                       |
| Junior clinician                                                                                             | 1 (6)                        |
| Number of years of ICU experience, median (IQR)                                                              | 6 (1-15)                     |
| Number of years of clinical healthcare experience, mean ( $\pm$ SD)                                          | 11 (8)                       |
| Place of work*, n (%)                                                                                        |                              |
| Intensive care 1                                                                                             | 5 (31)                       |
| Intensive care 2                                                                                             | 6 (38)                       |
| Intensive care 3                                                                                             | 5 (31)                       |
| Intensive care 4                                                                                             | 5 (31)                       |
| Involvement in physical rehabilitation, n (%)                                                                |                              |
| Participating in the decision over whether a patient is stable enough to mobilise.                           | 16 (100)                     |
| Leading rehabilitation treatment                                                                             | 10 (63)                      |
| Assisting with rehabilitation treatment                                                                      | 12 (75)                      |
| SD= standard deviation; IQR=interquartile range. *Some clinicians work on more than one intensive care unit. |                              |



**Table 2: Patient and caregiver participant demographics**

|                                                              | Former ICU patients and caregivers (N=14) |
|--------------------------------------------------------------|-------------------------------------------|
| Service user participants:                                   |                                           |
| Patients, n (%)                                              | 11 (79)                                   |
| Caregivers, n (%)                                            | 3 (21)                                    |
| Age, mean ( $\pm$ SD)                                        | 65 (10.7)                                 |
| Male, n (%)                                                  | 10 (71)                                   |
| Patient ICU length of stay in days* (n=11), mean ( $\pm$ SD) | 15 (10.8)                                 |
| Patient stated reason for admission (n=11), n (%)            |                                           |
| Aortic dissection                                            | 1 (9)                                     |
| Cardiac arrest                                               | 1 (9)                                     |
| Gastrointestinal                                             | 1 (9)                                     |
| Organ failure                                                | 1 (9)                                     |
| Septic shock                                                 | 1 (9)                                     |
| Surgery                                                      | 5 (45)                                    |
| Trauma                                                       | 1 (9)                                     |
| Site where ICU was experienced, n (%)                        |                                           |
| Intensive care 1                                             | 2 (14)                                    |
| Intensive care 2                                             | 11 (79)                                   |
| Intensive care 3                                             | 0 (0)                                     |
| Intensive care 4                                             | 1 (7)                                     |
| Highest level of physical rehabilitation experienced, n (%)  |                                           |
| Moving in bed                                                | 2 (14)                                    |
| Sitting in a chair                                           | 6 (43)                                    |
| Walking                                                      | 6 (43)                                    |

SD= standard deviation. \*Two participants reported their length of stay as approximate.

The study themes and subthemes are described in detail below. The supplementary material illustrates these themes and subthemes with verbatim quotes from participants, with participant numbers (see supplemental file 2 to link quote numbers with data).

### 1. Safety and physiological concerns

Clinician and patient participant concerns over the safety of rehabilitation were reported as a barrier to rehabilitation. This included the risk of dislodging lines and attachments (such as ventilator tubing and femoral lines (quote 1). However, some participants, who were mostly clinicians, did not perceive this as a barrier, if careful planning and also organisation of the bed space environment was carried out. For example, avoiding the use of femoral vascular catheters as access for haemofiltration or planning breaks in haemofiltration could enable rehabilitation. Endotracheal tubes or airways that had been difficult to insert, were also

1  
2  
3 cited as barriers, with the difficulty of titrating sedation for a balance between tube  
4 tolerance and patient alertness cited as one explanation by a clinician.  
5  
6

7  
8 Clinician participants identified particular patient groups with barriers to rehabilitation  
9 because they felt they were at an increased risk or they presented additional logistical  
10 challenges, such as those with multiple traumatic injuries (quote 2). They suggested that  
11 patients admitted after surgery could have certain surgical precautions which presented  
12 logistical issues contacting different teams to gain clarity over safety of rehabilitation.  
13  
14 Despite this, patients in ICU after elective surgery could have received pre-operative  
15 education or pre-planned rehabilitation programmes, both facilitating rehabilitation post-  
16 operatively.  
17  
18

19  
20  
21  
22  
23 Physiological instability, such as instances of respiratory distress or cardiovascular instability  
24 were reported as preventing rehabilitation treatments by participants who were mostly  
25 clinicians.  
26  
27

28  
29  
30 *“...it’s mainly blood pressure related for me, or their resp[iratory] rate. If I don’t think*  
31 *they’re going to tolerate mobilising, and if it’s going to cause more harm than good.”*  
32 *(Therapist 2, quote 3)*  
33  
34

35  
36 Dependence on organ support, such as the amount of respiratory support or vasoactive  
37 drugs were also identified as barriers. Clinician opinion ranged from perceiving patients  
38 receiving vasoactive drugs as a contraindication to rehabilitation (quote 4), to others who  
39 considered rehabilitation possible if a low or weaning dose was used or if the patient was  
40 less severely unwell, for example if vasoactive drugs were being used for epidural-induced  
41 hypotension. Risk relating to hypotension during rehabilitation was suggested by a clinician  
42 to relate to anxiety from junior staff about managing vasoactive drugs during mobilisation  
43 (quote 5). Some clinician participants suggested potential organ support barriers should be  
44 discussed with the ICU doctors and also advocated actively sedating patients less.  
45  
46  
47

48  
49 Patient participants sometimes reported feeling too unwell to actively participate in  
50 rehabilitation. Some patients reported profound feelings of weakness, making their bodies  
51 feel ‘like a lead weight’, which came as a surprise when they first tried to get up and was  
52 linked with feelings of vulnerability (quotes 6 and 7). These participants did then identify a  
53  
54  
55  
56  
57  
58  
59  
60

1  
2  
3 time in their recovery where these symptoms subsided to the point where they could then  
4 participate.  
5

6  
7 Additionally, level of alertness, confusion and agitation, cognitive impairments and  
8 personality disorders were all cited as barriers by clinicians (quote 8). Some patients and  
9 relatives recalled experiences of delirium and hallucinations as profound influences on their  
10 recovery in general.  
11  
12

13  
14  
15 The difference between clinicians' perception of safety and a patient's readiness to begin  
16 rehabilitation was expressed as a barrier by clinician participants (quote 9). Some  
17 explanations included clinician fear of the unwell patient and the risk of perceived harm  
18 which caused anxiety for some (quote 10).  
19  
20  
21

22  
23  
24 *"...happy to cause no harm, or kind of, and no perceived harm by not mobilising*  
25 *someone but actively getting up and causing harm is a, always going to be a*  
26 *significant anxiety for staff..." (Nurse 5, quote 11)*  
27  
28

29  
30 This was linked to clinician need for control over the physiological numbers, potentially  
31 leading to a reluctance to reduce that control by moving a patient out of bed (quote 12).  
32 One doctor suggested that a paradigm shift was required to address this barrier (quote 13).  
33 Another doctor said they modified targets for acceptable changes in physiological  
34 observations (such as blood pressure), to reassure other clinicians that mobility was still safe  
35 (quote 14).  
36  
37  
38  
39  
40  
41  
42  
43  
44

## 45 2. Patient participation and engagement

46  
47 Clinician participants reported experience of patients who may be reluctant to participate in  
48 rehabilitation. When asked about this theme, patient participant responses ranged from  
49 reporting enthusiastic engagement in rehabilitation, to not wishing to mobilise out of bed.  
50 Reasons cited for their reluctance included not wanting to do something perceived as  
51 potentially worsening their condition (quote 15). Furthermore, a lack of incentive or  
52 motivation to engage was discussed, as well as a feeling of weakness, which some found  
53 difficult to accept.  
54  
55  
56  
57  
58  
59  
60

1  
2  
3                   *"...there were times when I simply didn't want to do it... Depression, ... lack of energy,*  
4                   *lack of spirits really ..."* (Patient 7, quote 16)  
5  
6

7  
8 Suboptimal communication between patients and clinicians was felt to be a barrier to  
9 rehabilitation by some patient and clinician participants. Suggested reasons included the  
10 little time spent by clinicians discussing rehabilitation, difficulty communicating  
11 rehabilitation goals and some sometimes showed a lack of empathy. Suggested ways of  
12 overcoming these issues included maximising a patient's ability to communicate, giving  
13 more reassurance, building up trust, showing kindness and helping patients to feel safe  
14 (quote 17). Patients valued humour from staff and felt rapport was aided by staff continuity.  
15 Patients and relatives recommended that when a patient was reluctant to mobilise, an  
16 encouraging and diplomatic approach balanced with assertiveness from clinicians to "push"  
17 patients (quote 18).  
18  
19  
20  
21  
22  
23  
24  
25

26  
27 Some patient participants recommended that strategies to improve patient engagement in  
28 rehabilitation should always be patient-specific. Other suggestions, mostly from clinicians,  
29 included promoting sleep at night, involving patients in planning a rehabilitation timetable,  
30 goal setting and using outcome measures to demonstrate progress (quote 19). Furthermore,  
31 education for patients and relatives at the appropriate time, around the importance of  
32 rehabilitation was suggested.  
33  
34  
35  
36  
37

38  
39 Further facilitators suggested by patients and clinicians included the use of meaningful  
40 activities and identifying key patient motivators. The importance of tailoring rehabilitation  
41 to include activities meaningful to patients (such as functional tasks and personal care  
42 activities based on previous interests) were identified to facilitate engagement within a  
43 context more readily understood by patients.  
44  
45  
46  
47

48                   *"Looking at therapy in a slightly different way and finding an activity that's*  
49                   *meaningful to [patients], whether that's personal care or leisure activities, and*  
50                   *through that encouraging them to... engage in that activity and then helping them to*  
51                   *see the therapeutic value of that."* (Therapist 4, quote 20)  
52  
53  
54  
55  
56

57 Recognising key patient motivators such as gaining independence and dignity by being able  
58 to do more for themselves was also suggested (quote 21). Patients reported being  
59  
60

1  
2  
3 motivated through their improvement during rehabilitation sessions, almost as a proxy for  
4 improvement from critical illness. Patient qualities of resilience, determination and a  
5 positive mental attitude were reported as a facilitator by patients themselves.  
6  
7  
8  
9

10 The role of family was discussed as both a barrier and facilitator. Instances were reported by  
11 some clinician participants where relatives could be reluctant for patient participation in  
12 rehabilitation. When this was discussed with patient and relative participants, responses  
13 ranged from an understanding of why this happens, to a strong disbelief that this could be  
14 the case. The role of family in encouraging patients was discussed, with some highlighting  
15 how they were motivated to improve mobility to help their family member feel better  
16 (quote 22).  
17  
18  
19  
20  
21  
22

### 23 *3. Clinician experience and knowledge*

24 Clinician participants discussed the experience and knowledge of those carrying out  
25 rehabilitation. A lack of experience, confidence and senior support were cited as barriers  
26 (quote 23). However, some therapists also proposed those clinicians with more experience  
27 could pose a barrier. They suggested some more experienced nurses may perceive  
28 rehabilitation as outside of their role or may have spent more time in an environment  
29 where rehabilitation was not a priority. Opinions over experience as a facilitator also varied.  
30 Some emphasised that a team with the right skill mix (including adequate senior support)  
31 was important, with a nurse suggesting having more confident staff freed up time for  
32 rehabilitation. However, some therapists reported that more inexperienced nurses could be  
33 a facilitator as they have received recent training in rehabilitation. One therapist cited  
34 enthusiasm as being more important than experience to facilitate rehabilitation.  
35  
36  
37  
38  
39  
40  
41  
42  
43  
44  
45  
46

47 A lack of training and knowledge, including about the importance of rehabilitation,  
48 organisation and planning of sessions and therapeutic manual handling were suggested as  
49 important factors by clinicians.  
50  
51  
52

53 *“It doesn’t happen because... we are not aware enough yet how important it is, or*  
54 *how much difference it could make, so it’s not embedded in our thinking and in our*  
55 *behaviour...” (Doctor 4, quote 24)*  
56  
57  
58  
59  
60

1  
2  
3 A popular strategy suggested by clinicians to address these barriers was through education  
4 and training for the ICU interdisciplinary team, such as through study days and experiential  
5 learning (quote 25). Additionally, the use of a rehabilitation policy and guidelines to drive  
6 implementation and aid less experienced clinicians know when to begin rehabilitation was  
7 discussed.  
8  
9  
10  
11  
12  
13

#### 14 4. Teamwork

15  
16 Discussion of teamwork covered team culture, clinician roles, rehabilitation definitions and  
17 logistics. A lack of a rehabilitation culture leading to some staff having a less proactive  
18 attitude to rehabilitation delivery was discussed.  
19  
20  
21  
22

23  
24 *“But a lot of it’s just to do with the attitude of the individual staff member, how*  
25 *proactive they are and how much they believe in mobilisation as a kind of key thing”*  
26 *(Nurse 5, quote 26)*  
27  
28  
29

30 One explanatory factor was a lack of medical leadership. Participants (mostly clinicians)  
31 suggested promoting a culture where an interdisciplinary team works together to promote  
32 rehabilitation as routine and important, would facilitate implementation. A less hierarchical  
33 culture would encourage proactive team planning and problem solving, with medical  
34 leadership again emphasised as key (quote 27).  
35  
36  
37  
38  
39

40 Another key barrier to rehabilitation discussed by clinicians, was differences in opinion  
41 between professions over roles and responsibilities (quote 28). Some reported that  
42 rehabilitation was perceived as only a therapist’s job (quote 29). Therapists reported that  
43 there could be a lack of understanding of their role or their other responsibilities, for  
44 example, covering other clinical areas in addition to the ICU. To overcome this, clinicians  
45 suggested promoting teamwork where separate responsibilities were acknowledged and  
46 there was a willingness to crossover professional roles, with therapists empowering nurses  
47 to facilitate rehabilitation (quote 30).  
48  
49  
50  
51  
52  
53  
54  
55

56 Differences in opinions over roles and responsibilities were impacted upon by variation in  
57 how rehabilitation was defined and delivered. This in itself may explain some of the  
58 difficulty in promoting a proactive rehabilitation culture. Clinicians sometimes limited their  
59  
60

1  
2  
3 definition of rehabilitation to a patient sitting out in a chair (quote 31). Conversely,  
4 occupational therapist (OT) participants widened the concept of rehabilitation to  
5 encompass a twenty-four hour interdisciplinary approach utilising functional tasks.  
6  
7  
8

9  
10 *“...rehabilitation is not, you know, 20 minutes with the physio or the OT every day.*  
11 *Really good rehabilitation is a 24 hour approach, and that – part of that is positioning*  
12 *a patient in bed. Part of that is ensuring the patient gets the right nutrition as well as*  
13 *looking at the actual physical things that they’re doing.” (Therapist 4, quote 32)*  
14  
15  
16  
17

18 This may increase patient engagement and interdisciplinary involvement, by helping staff to  
19 incorporate more rehabilitation activities during the course of their normal duties, for  
20 example during personal care activities (quote 33).  
21  
22  
23

24  
25 Finally, lack of staff and logistical difficulties in implementing rehabilitation were suggested  
26 as barriers by clinicians and patients. Greater investment in staffing and utilisation of  
27 healthcare support workers was suggested to address this. Logistical concerns covered the  
28 number of staff required and the duration of a rehabilitation session in competition with  
29 other unit procedures. Logistical barriers also concerned a difficulty in timing around nurses’  
30 rest breaks and staffing ratios (quote 34). Within the study ICUs, once a patient’s illness  
31 severity decreased to a certain level, the nursing staffing ratio fell from one nurse to one  
32 patient to one nurse to two patients, coinciding with a potential increase in readiness for  
33 rehabilitation. Potential strategies to address these concerns include proactive planning of  
34 sessions, for example during morning team briefings. Additionally, a change to working  
35 patterns to build in more time for rehabilitation to occur was suggested.  
36  
37  
38  
39  
40  
41  
42  
43  
44  
45  
46  
47

#### 48 *5. Equipment and environment*

49

50 A lack of working specialist rehabilitation equipment was highlighted as a barrier by clinician  
51 participants (quote 35). Clinicians advocated greater investment and suggested the whole  
52 team to take ownership of ensuring equipment was fixed or to find funding sources for  
53 equipment replacement. Environmental concerns raised by patients and clinicians firstly  
54 covered practical limitations such as space to move rehabilitation equipment around the  
55  
56  
57  
58  
59  
60

1  
2  
3 bedspace. Furthermore, a patient highlighted the nature of the ICU environment itself did  
4 not encourage them to move out of bed (quote 36).

5  
6  
7 *“...you can see some bright lights and monitors, you can hear monitors going off, but you*  
8 *don’t have the, “Crash, bang, wallops!” that you get in a general ward... but it’s a*  
9 *capsule and a bubble, it’s a weird feeling... “People think it’s like being in a spaceship”*  
10 *and I thought, “That’s such a good description” and that’s how it did feel.” (Patient 8,*  
11 *quote 37)*

## 12 13 14 15 16 17 18 19 20 6. Risks and benefits of rehabilitation in intensive care

21  
22 Opinions over risks and benefits were explored, which closely related to safety, knowledge  
23 and attitude towards rehabilitation. Clinician ideas about risks resembled the safety issues  
24 from theme one, however, this did not necessarily mean a reluctance to mobilise (quotes 38  
25 and 39). Most patients and relatives reported they had not worried about the risks of  
26 mobilising whilst in an ICU (quote 40), although some had experienced things such as  
27 dizziness and one reported passing out. Considering benefits reported by clinicians and  
28 patients, physical benefits of rehabilitation focused on the acute impact of improving  
29 physical function, including in preparation for recovery on the wards (quote 41). Suggested  
30 psychological benefits for the patient included helping mood and wellbeing and restoring a  
31 sense of dignity.

32  
33  
34  
35  
36  
37  
38  
39  
40  
41 *“...the important thing is you sense that you’re not just lying there waiting to die. ...so*  
42 *you are... you are... coming back to being a human being that wants to live.” (Patient*  
43 *7, quote 42)*

44  
45  
46  
47  
48 Finally, several clinicians reported how a benefit of patient rehabilitation was the  
49 encouragement and sense of achievement it provided for staff.

50  
51  
52 The overarching theme for how to overcome barriers to physical ICU rehabilitation related  
53 to moving from a multidisciplinary approach where different professions work together but  
54 have separate responsibilities; towards a patient-centred, interdisciplinary team approach.  
55 This was where all parties have a shared aim of providing physical rehabilitation (quotes 27  
56 and 30). This can facilitate clinicians working together to develop a shared understanding of  
57  
58  
59  
60



1  
2  
3 the definition of rehabilitation, so patients can participate in activities that are more  
4 meaningful. Furthermore, an agreement can be developed among the team, about the  
5 benefits and risks, the optimum way to deliver rehabilitation and when it is safe to start.  
6  
7 This can then help different professions to collaborate to help to overcome barriers related  
8  
9 to team working and to improve the ICU environment.  
10  
11  
12  
13  
14  
15

## 16 **Discussion**

17  
18 This study has provided an in-depth exploration of the views of multi-professional ICU  
19 clinicians and was strengthened by including former ICU patients and their relatives, adding  
20 to the knowledge of overcoming barriers to ICU physical rehabilitation. Primarily this is  
21 suggested to be through a change in approach to team working, from a multidisciplinary to  
22 an interdisciplinary and patient-centred approach. This means moving from a  
23 multidisciplinary way of working where a team is made up of different professions working  
24 on their distinct priorities [43-45], to an interdisciplinary approach where a team of different  
25 professions work together with ICU rehabilitation a priority for all. This therefore  
26 emphasises a shift from rehabilitation primarily being the focus of therapy staff, to one  
27 where all team members have joint accountability and identify this as a key aspect to their  
28 work, contributing in overlapping ways but also in ways relevant to their professional skills  
29 and knowledge [46 47]. This change in perspective could facilitate a change in opinion over  
30 the definition and delivery of rehabilitation towards an interdisciplinary, 24-hour approach  
31 that includes activities meaningful to patients to facilitate engagement. An interdisciplinary  
32 working model has previously been used to facilitate more efficient and effective care  
33 during critical illness and in general rehabilitation delivery. Reported outcomes have  
34 included more coordinated inter-professional working and enhanced delivery of appropriate  
35 patient care [44 48 49].  
36  
37  
38  
39  
40  
41  
42  
43  
44  
45  
46  
47  
48  
49  
50

51  
52 It is interesting to see that several of the themes of barriers and facilitators to ICU  
53 rehabilitation are similar to previous qualitative studies. This includes themes of safety [23  
54 24 27 28 50], patient engagement [29], knowledge and experience [21-26] and team work  
55 [20 22-25 27-29 50]. Patient reports of experiencing feelings of weakness and vulnerability  
56 in this present study have also previously been identified [30 51] where their vulnerability  
57  
58  
59  
60

1  
2  
3 may be explained, at least in part, by patients adjusting to being critically ill whilst having  
4 little or no memory of their deterioration into critical illness [52]. In our study, clinicians  
5 expressed differences in opinion over roles and responsibilities towards rehabilitation as  
6 well as safety concerns for initiating treatment. Staff confidence in rehabilitation provision  
7 may contribute towards differences in viewpoints and engagement, particularly towards  
8 opinions on readiness of a patient to begin rehabilitation. This may be partially explained  
9 through differences in personality traits between those more or less able to make pragmatic  
10 concessions to adjust to the limitations of the working environment to ensure reasonable  
11 care is delivered and to tolerate greater variability in acceptable target physiological  
12 observations[53]. This would therefore represent an important factor to address with staff  
13 when overcoming barriers to rehabilitation, for example, to achieve the paradigm shift  
14 suggested by some participants to enable clinicians to address anxiety in relation to control  
15 over physiological parameters.  
16  
17

18 This study has added to previous knowledge in several ways. Interestingly and perhaps  
19 surprisingly, less clinical experience was highlighted as a potential facilitator of  
20 rehabilitation. Some therapists reported that more inexperienced nurses have received  
21 recent training in rehabilitation and one therapist cited enthusiasm as more important than  
22 experience. Additionally, perceptions of the content of rehabilitation were notable. Some  
23 viewed rehabilitation as being limited to sitting in a chair. This can contribute to a limited  
24 scope of rehabilitation practice [26] and may have contributed to the lack of rehabilitation  
25 culture reported by some participants in this study. The occupational therapists emphasised  
26 the inclusion of personal care activities as part of ICU rehabilitation delivered at any point in  
27 the day by any profession, to facilitate a more positive rehabilitation culture. This is  
28 supported by Laerkner, et al. [54] who compared the views of nurses and patients in  
29 Denmark, and found nurses recommended incorporating familiar activities into  
30 rehabilitation and patients emphasised the importance of empathy and compromise from  
31 clinicians. Whilst patients in this present study agreed with Laerkner's recommendations of  
32 clinician-patient communication, they also emphasised that at times, a more assertive  
33 approach from clinicians in encouraging rehabilitation is desirable.  
34  
35  
36  
37  
38  
39  
40  
41  
42  
43  
44  
45  
46  
47  
48  
49  
50  
51  
52  
53  
54  
55  
56

57 The findings from this study focus us to create a patient-centred interdisciplinary approach  
58 to rehabilitation. This involves considering how clinicians communicate with patients and  
59  
60

1  
2  
3 broadening the definition of rehabilitation to include functional tasks that are meaningful to  
4 patients. Furthermore, broadening delivery of rehabilitation to a 24-hour holistic approach  
5 that includes family members[55-57], with a focus on prioritising patient-reported  
6 motivators of independence and dignity and to progress back towards normality. Facilitating  
7 this change in a multifaceted ICU environment would benefit from using implementation  
8 and improvement science methodology, where co-design by ICU clinicians from different  
9 professions, as well as service users can be employed. This change in practise should be  
10 evaluated not only in terms of whether it improves rehabilitation delivery without impacting  
11 patient safety, but also in terms of how these changes influence other ICU procedures and  
12 working practices [58].  
13  
14  
15  
16  
17  
18  
19  
20  
21

22 Limitations of this study include the potential for poor recall from patient or relative/carer  
23 participants as the time from ICU admission to interview was not recorded[52 59]. However,  
24 as participants were usually recruited at their first ICU follow up appointment, this was  
25 unlikely to be an extended time. Furthermore, language limitations of some participants  
26 sometimes made it difficult to discern the exact point they were making during analysis,  
27 therefore although this demonstrates diversity within the sample, some finer detail may  
28 have been lost. The method of approach may have meant that more patients actively  
29 engaged in the issues being evaluated were recruited. Those patients not attending follow  
30 up appointments may have had different opinions. Pragmatic restrictions meant few family  
31 members were recruited and more patients who had experienced one of the ICU sites were  
32 involved. Finally, the application of these findings to other areas should consider that  
33 participants were included from sites in one city.  
34  
35  
36  
37  
38  
39  
40  
41  
42  
43  
44

45 In conclusion, this exploration of a range of clinician and patient perspective suggested a  
46 patient-centred, interdisciplinary approach to implementing ICU physical rehabilitation.  
47 These findings constitute a starting point for optimising rehabilitation delivery through  
48 improvement and implementation science.  
49  
50  
51

### 52 **Acknowledgements**

53  
54 We thank staff at the research site for their support in facilitating recruitment and data  
55 collection. Data from this study has previously been presented at the Intensive Care Society  
56 State of the Art meeting 2018 and 2021, the 6th European Conference on Weaning and  
57  
58  
59  
60

1  
2  
3 Rehabilitation in Critically Ill Patients 2018, Physiotherapy UK conference 2018 and the  
4 North West London Research Symposium for Health Professions 2018.  
5  
6

### 7 **Funding statement**

8  
9  
10 This report is independent research arising from a Clinical Doctoral Research Fellowship,  
11 awarded to HRW, (ICA-CDRF-2015-01-026), supported by the National Institute for Health  
12 Research (NIHR) and Health Education England. The views expressed in this publication are  
13 those of the authors and not necessarily those of the NHS, the NIHR, Health Education  
14 England or the Department of Health. We acknowledge the support of the NIHR Clinical  
15 Research Network and infrastructure support for this research was provided by the NIHR  
16 Imperial Biomedical Research Centre (BRC). HRW is supported by the NIHR Imperial BRC.  
17  
18  
19  
20  
21  
22  
23

### 24 **Competing interests statement**

25  
26 HRW reports personal lecture fees from Brunel University and the University of East  
27 London. CN reports personal lecture fees from Janssen Pharmaceuticals and Web MD. CMA  
28 is a National Institute of Health Research PhD fellowship committee member, although not  
29 at the time that funding was awarded for this study. ACG reports salary support from an  
30 NIHR Research Professorship (RP-2015-06-018) and research support from the NIHR  
31 Imperial BRC.  
32  
33  
34  
35  
36  
37  
38

### 39 **Author contributions**

40  
41 HRW, SJB, CMA and ACG contributed to the conception and planning of this work. HRW, CN,  
42 MJ, SJB, CMA and ACG contributed substantially to the design of this work. HRW carried out  
43 recruitment of participants with assistance from SJB. HRW also completed data collection  
44 and CN, MJ, SJB, CMA and ACG advised on the conduct of the study. HRW had main  
45 responsibility for carrying out analysis; MJ, CN and CMA assisted in checking development of  
46 themes and HRW, CN, MJ, SJB, CMA and ACG advised on interpretation of data. HRW  
47 drafted this report, and all authors revised it critically for important content and approved  
48 the final published version. All authors are accountable for the accuracy and integrity of the  
49 work.  
50  
51  
52  
53  
54  
55  
56  
57

### 58 **Ethics approval**

This study involves human participants and was approved by the London – Bloomsbury Research Ethics Committee (17/LO/0362). Participants gave informed consent to participate in the study before taking part.

### Data availability statement

No data are available.

### References

1. Puthuchery ZA, Rawal J, McPhail M, et al. Acute skeletal muscle wasting in critical illness. *JAMA* 2013;310:1591-600.
2. Fan E, Dowdy DW, Colantuoni E, et al. Physical complications in acute lung injury survivors: a two-year longitudinal prospective study. *Crit Care Med* 2014;42:849-59.
3. Latronico N, Herridge M, Hopkins RO, et al. The ICM research agenda on intensive care unit-acquired weakness. *Intensive Care Med* 2017;43:1270-81.
4. Herridge MS, Tansey CM, Matte A, et al. Functional disability 5 years after acute respiratory distress syndrome. *N Engl J Med* 2011;364:1293-304.
5. Hodgson CL, Udy AA, Bailey M, et al. The impact of disability in survivors of critical illness. *Intensive Care Med* 2017;43:992-1001.
6. Bailey P, Thomsen GE, Spuhler VJ, et al. Early activity is feasible and safe in respiratory failure patients. *Crit Care Med* 2007;35:139-45.
7. Clarissa C, Salisbury L, Rodgers S, et al. Early mobilisation in mechanically ventilated patients: a systematic integrative review of definitions and activities. *J Intensive Care* 2019;7:3.
8. Hodgson CL, Stiller K, Needham DM, et al. Expert consensus and recommendations on safety criteria for active mobilization of mechanically ventilated critically ill adults. *Crit Care* 2014;18:658.
9. Wang YT, Lang JK, Haines KJ, et al. Physical Rehabilitation in the ICU: A Systematic Review and Meta-Analysis. *Crit Care Med* 2021. <https://www.ncbi.nlm.nih.gov/pubmed/34406169> (accessed 8th January 2022).
10. Team Study Investigators, Anzics Clinical Trials Group, Hodgson CL, et al. Early Active Mobilization during Mechanical Ventilation in the ICU. *N Engl J Med* 2022;387:1747-58.
11. Connolly BA, Mortimore JL, Douiri A, et al. Low Levels of Physical Activity During Critical Illness and Weaning: The Evidence-Reality Gap. *J Intensive Care Med* 2019;34:818-27.
12. Nydahl P, Ruhl AP, Bartoszek G, et al. Early mobilization of mechanically ventilated patients: a 1-day point-prevalence study in Germany. *Crit Care Med* 2014;42:1178-86.
13. Bakhru RN, Wiebe DJ, McWilliams DJ, et al. An Environmental Scan for Early Mobilization Practices in U.S. ICUs. *Crit Care Med* 2015;43:2360-9.
14. Berney SC, Harrold M, Webb SA, et al. Intensive care unit mobility practices in Australia and New Zealand: a point prevalence study. *Crit Care Resusc* 2013;15:260-5.
15. Jolley SE, Moss M, Needham DM, et al. Point Prevalence Study of Mobilization Practices for Acute Respiratory Failure Patients in the United States. *Crit Care Med* 2017;45:205-15.
16. Sibilla A, Nydahl P, Greco N, et al. Mobilization of Mechanically Ventilated Patients in Switzerland. *J Intensive Care Med* 2020;35:55-62.
17. Timenetsky KT, Neto AS, Assunção MSC, et al. Mobilization practices in the ICU: A nationwide 1-day point- prevalence study in Brazil. *PLOS ONE* 2020;15:e0230971.
18. Parry SM, Knight LD, Connolly B, et al. Factors influencing physical activity and rehabilitation in survivors of critical illness: a systematic review of quantitative and qualitative studies. *Intensive Care Med* 2017;43:531-42.

19. Ormston R, Spencer L, Barnard M, et al. The foundations of qualitative research. In: Ritchie J, Lewis J, McNaughton Nicholls C, et al., eds. *Qualitative research practice A guide for social science students and researchers*. 2nd ed. London: SAGE 2014:1-25.
20. Barber EA, Everard T, Holland AE, et al. Barriers and facilitators to early mobilisation in Intensive Care: a qualitative study. *Aust Crit Care* 2015;28:177-82; quiz 83.
21. Anekwe DE, Milner SC, Bussieres A, et al. Intensive care unit clinicians identify many barriers to, and facilitators of, early mobilisation: a qualitative study using the Theoretical Domains Framework. *J Physiother* 2020;66:120-27.
22. Chaplin T, McLuskey J. What influences nurses' decision to mobilise the critically ill patient? *Nurs Crit Care* 2020;25:353-59.
23. Parry SM, Remedios L, Denehy L, et al. What factors affect implementation of early rehabilitation into intensive care unit practice? A qualitative study with clinicians. *J Crit Care* 2017;38:137-43.
24. Holdsworth C, Haines KJ, Francis JJ, et al. Mobilization of ventilated patients in the intensive care unit: An elicitation study using the theory of planned behavior. *J Crit Care* 2015;30:1243-50.
25. Goddard SL, Lorencatto F, Koo E, et al. Barriers and facilitators to early rehabilitation in mechanically ventilated patients-a theory-driven interview study. *J Intensive Care* 2018;6:4.
26. Krupp AE, Ehlenbach WJ, King B. Factors Nurses in the Intensive Care Unit Consider When Making Decisions About Patient Mobility. *Am J Crit Care* 2019;28:281-89.
27. Eakin MN, Ugbah L, Arnautovic T, et al. Implementing and sustaining an early rehabilitation program in a medical intensive care unit: A qualitative analysis. *J Crit Care* 2015;30:698-704.
28. Curtis L, Irwin J. Ambulation of patients who are mechanically ventilated: nurses' views. *Nurs Manag* 2017;24:34-39.
29. Williams N, Flynn M. An exploratory study of physiotherapists' views of early rehabilitation in critically ill patients. *Physiother Pract Res* 2013;34:93-102.
30. van Willigen Z, Ostler C, Thackray D, et al. Patient and family experience of physical rehabilitation on the intensive care unit: a qualitative exploration. *Physiotherapy* 2020;109:102-10.
31. Ritchie J, Lewis J, McNaughton Nicholls C, et al. *Qualitative research practice. A guide for social science students and researchers*. 2nd ed. London: SAGE 2014.
32. Tong A, Sainsbury P, Craig J. Consolidated criteria for reporting qualitative research (COREQ): a 32-item checklist for interviews and focus groups. *Int J Qual Health Care* 2007;19:349-57.
33. Bryman A. *Social research methods*. 5th ed. Oxford: Oxford University Press 2016.
34. Ritchie J, Lewis J, Elam G, et al. Designing and selecting samples. In: Ritchie J, Lewis J, McNaughton Nicholls C, et al., eds. *Qualitative research practice A guide for social science students and researchers*. 2nd ed. London: SAGE 2014:111-45.
35. Britten N. Qualitative interviews in medical research. *BMJ* 1995;311:251-3.
36. Doody O, Noonan M. Preparing and conducting interviews to collect data. *Nurse Res* 2013;20:28-32.
37. Yeo A, Legard R, Keegan J, et al. In-depth interviews. In: Ritchie J, Lewis J, McNaughton Nicholls C, et al., eds. *Qualitative research practice A guide for social science students and researchers*. 2nd ed. London: SAGE 2014.
38. Strauss A, Corbin J. *Basics of qualitative research. Techniques and procedures for developing grounded theory*. 2nd ed. London: SAGE Publications 1998.
39. Dubb R, Nydahl P, Hermes C, et al. Barriers and Strategies for Early Mobilization of Patients in Intensive Care Units. *Ann Am Thorac Soc* 2016;13:724-30.
40. McConnell-Henry T, Chapman Y, Francis K. Member checking and Heideggerian phenomenology: a redundant component. *Nurse Res* 2011;18:28-37.
41. Spencer L, Ritchie J, Ormston R, et al. Analysis: Principles and processes. In: Ritchie J, Lewis J, McNaughton Nicholls C, et al., eds. *Qualitative research practice A guide for social science students and researchers*. 2nd ed. London: SAGE 2014:269-93.



- 1
- 2
- 3
- 4 42. Spencer L, Ritchie J, O'Connor W, et al. Analysis in practice. In: Ritchie J, Lewis J, McNaughton
- 5 Nicholls C, et al., eds. *Qualitative research practice A guide for social science students and*
- 6 *researchers*. 2nd ed. London: SAGE 2014:295-345.
- 7 43. Choi BC, Pak AW. Multidisciplinarity, interdisciplinarity and transdisciplinarity in health research,
- 8 services, education and policy: 1. Definitions, objectives, and evidence of effectiveness. *Clin*
- 9 *Invest Med* 2006;29:351-64.
- 10 44. Korner M. Interprofessional teamwork in medical rehabilitation: a comparison of
- 11 multidisciplinary and interdisciplinary team approach. *Clin Rehabil* 2010;24:745-55.
- 12 45. Jennings C, Astin F. A multidisciplinary approach to prevention. *Eur J Prev Cardiol* 2017;24:77-87.
- 13 46. Bronstein LR. A model for interdisciplinary collaboration. *Soc Work* 2003;48:297-306.
- 14 47. Petri L. Concept analysis of interdisciplinary collaboration. *Nurs Forum* 2010;45:73-82.
- 15 48. Irwin RS, Flaherty HM, French CT, et al. Interdisciplinary collaboration: the slogan that must be
- 16 achieved for models of delivering critical care to be successful. *Chest* 2012;142:1611-19.
- 17 49. Urisman T, Garcia A, Harris HW. Impact of surgical intensive care unit interdisciplinary rounds on
- 18 interprofessional collaboration and quality of care: Mixed qualitative-quantitative study.
- 19 *Intensive Crit Care Nurs* 2018;44:18-23.
- 20 50. Liew SM, Mordiffi SZ, Ong YJA, et al. Nurses' perceptions of early mobilisation in the adult
- 21 Intensive Care Unit: A qualitative study. *Intensive Crit Care Nurs* 2021;66:103039.
- 22 51. Soderberg A, Karlsson V, Ahlberg BM, et al. From fear to fight: Patients experiences of early
- 23 mobilization in intensive care. A qualitative interview study. *Physiother Theory Pract* 2020.
- 24 <https://www.tandfonline.com/doi/full/10.1080/09593985.2020.1799460> (accessed 12 July
- 25 2021).
- 26 52. Corner EJ, Murray EJ, Brett SJ. Qualitative, grounded theory exploration of patients' experience
- 27 of early mobilisation, rehabilitation and recovery after critical illness. *BMJ Open*
- 28 2019;9:e026348.
- 29 53. D'Lima DM, Murray EJ, Brett SJ. Perceptions of Risk and Safety in the ICU: A Qualitative Study of
- 30 Cognitive Processes Relating to Staffing. *Crit Care Med* 2018;46:60-70.
- 31 54. Laerkner E, Egerod I, Olesen F, et al. Negotiated mobilisation: An ethnographic exploration of
- 32 nurse-patient interactions in an intensive care unit. *J Clin Nurs* 2019;28:2329-39.
- 33 55. Heyland DK, Davidson J, Skrobik Y, et al. Improving partnerships with family members of ICU
- 34 patients: study protocol for a randomized controlled trial. *Trials* 2018;19:3.
- 35 56. Marshall AP, Wake E, Weisbrodt L, et al. A multi-faceted, family-centred nutrition intervention to
- 36 optimise nutrition intake of critically ill patients: The OPTICS feasibility study. *Aust Crit Care*
- 37 2016;29:68-76.
- 38 57. Haines KJ. Engaging Families in Rehabilitation of People Who Are Critically Ill: An Underutilized
- 39 Resource. *Phys Ther* 2018;98:737-44.
- 40 58. Skivington K, Matthews L, Simpson SA, et al. A new framework for developing and evaluating
- 41 complex interventions: update of Medical Research Council guidance. *BMJ* 2021;374:n2061.
- 42 59. Nickels MR, Aitken LM, Barnett AG, et al. Acceptability, safety, and feasibility of in-bed cycling
- 43 with critically ill patients. *Aust Crit Care* 2020;33:236-43.
- 44
- 45
- 46
- 47
- 48
- 49
- 50
- 51
- 52
- 53
- 54
- 55
- 56
- 57
- 58
- 59
- 60

## Consolidated criteria for reporting qualitative research checklist

Adapted from: TONG, A., SAINSBURY, P. & CRAIG, J. 2007. Consolidated criteria for reporting qualitative research (COREQ): a 32-item checklist for interviews and focus groups. *Int J Qual Health Care*, 19, 349-57.

| Topic                                          | Item no. | Guide questions/ descriptions                                                                                                                            | Reported on page no. |
|------------------------------------------------|----------|----------------------------------------------------------------------------------------------------------------------------------------------------------|----------------------|
| <b>Domain 1: Research team and reflexivity</b> |          |                                                                                                                                                          |                      |
| Personal Characteristics                       |          |                                                                                                                                                          |                      |
| Interviewer/facilitator                        | 1        | Which author/s conducted the interview or focus group?                                                                                                   | 6                    |
| Credentials                                    | 2        | What were the researcher's credentials? E.g. PhD, MD                                                                                                     | 6                    |
| Occupation                                     | 3        | What was their occupation at the time of the study?                                                                                                      | 6-7                  |
| Gender                                         | 4        | Was the researcher male or female?                                                                                                                       | 6                    |
| Experience and training                        | 5        | What experience or training did the researcher have?                                                                                                     | 6-7                  |
| Relationship with participants                 |          |                                                                                                                                                          |                      |
| Relationship established                       | 6        | Was a relationship established prior to study commencement?                                                                                              | 6-7                  |
| Participant knowledge of the interviewer       | 7        | What did the participants know about the researcher? e.g. personal goals, reasons for doing the research                                                 | 6-7                  |
| Interviewer characteristics                    | 8        | What characteristics were reported about the interviewer/facilitator? e.g. Bias, assumptions, reasons and interests in the research topic                | 6-7                  |
| <b>Domain 2: study design</b>                  |          |                                                                                                                                                          |                      |
| Theoretical framework                          |          |                                                                                                                                                          |                      |
| Methodological orientation and Theory          | 9        | What methodological orientation was stated to underpin the study? e.g. grounded theory, discourse analysis, ethnography, phenomenology, content analysis | 4                    |
| Participant selection                          |          |                                                                                                                                                          |                      |
| Sampling                                       | 10       | How were participants selected? e.g. purposive, convenience, consecutive, snowball                                                                       | 5                    |
| Method of approach                             | 11       | How were participants approached? e.g. face-to-face, telephone, mail, email                                                                              | 5                    |
| Sample size                                    | 12       | How many participants were in the study?                                                                                                                 | 8                    |
| Non-participation                              | 13       | How many people refused to participate or dropped out? Reasons?                                                                                          | 8                    |
| Setting                                        |          |                                                                                                                                                          |                      |
| Setting of data collection                     | 14       | Where was the data collected? e.g. home, clinic, workplace                                                                                               | 6                    |
| Presence of non-participants                   | 15       | Was anyone else present besides the participants and researchers?                                                                                        | 6                    |
| Description of sample                          | 16       | What are the important characteristics of the sample? e.g. demographic data, date                                                                        | 9-10                 |
| Data collection                                |          |                                                                                                                                                          |                      |



|    |                                        |    |                                                                                                                                   |                               |
|----|----------------------------------------|----|-----------------------------------------------------------------------------------------------------------------------------------|-------------------------------|
| 1  | Interview guide                        | 17 | Were questions, prompts, guides provided by the authors? Was it pilot tested?                                                     | 6                             |
| 2  |                                        |    |                                                                                                                                   |                               |
| 3  | Repeat interviews                      | 18 | Were repeat interviews carried out? If yes, how many?                                                                             | 6                             |
| 4  |                                        |    |                                                                                                                                   |                               |
| 5  | Audio/visual recording                 | 19 | Did the research use audio or visual recording to collect the data?                                                               | 6                             |
| 6  |                                        |    |                                                                                                                                   |                               |
| 7  | Field notes                            | 20 | Were field notes made during and/or after the interview or focus group?                                                           | 7                             |
| 8  |                                        |    |                                                                                                                                   |                               |
| 9  | Duration                               | 21 | What was the duration of the interviews or focus group?                                                                           | 8                             |
| 10 |                                        |    |                                                                                                                                   |                               |
| 11 | Data saturation                        | 22 | Was data saturation discussed?                                                                                                    | 5-6                           |
| 12 |                                        |    |                                                                                                                                   |                               |
| 13 | Transcripts returned                   | 23 | Were transcripts returned to participants for comment and/or correction?                                                          | 6                             |
| 14 |                                        |    |                                                                                                                                   |                               |
| 15 | <b>Domain 3: analysis and findings</b> |    |                                                                                                                                   |                               |
| 16 | Data analysis                          |    |                                                                                                                                   |                               |
| 17 | Number of data coders                  | 24 | How many data coders coded the data?                                                                                              | 7                             |
| 18 |                                        |    |                                                                                                                                   |                               |
| 19 | Description of the coding tree         | 25 | Did authors provide a description of the coding tree?                                                                             | Supplementary material        |
| 20 |                                        |    |                                                                                                                                   |                               |
| 21 | Derivation of themes                   | 26 | Were themes identified in advance or derived from the data?                                                                       | 7                             |
| 22 |                                        |    |                                                                                                                                   |                               |
| 23 | Software                               | 27 | What software, if applicable, was used to manage the data?                                                                        | 7                             |
| 24 |                                        |    |                                                                                                                                   |                               |
| 25 | Participant checking                   | 28 | Did participants provide feedback on the findings?                                                                                | 5-6                           |
| 26 |                                        |    |                                                                                                                                   |                               |
| 27 | Reporting                              |    |                                                                                                                                   |                               |
| 28 | Quotations presented                   | 29 | Were participant quotations presented to illustrate the themes / findings? Was each quotation identified? e.g. participant number | 11-17, supplementary material |
| 29 |                                        |    |                                                                                                                                   |                               |
| 30 | Data and findings consistent           | 30 | Was there consistency between the data presented and the findings?                                                                | 10-18, supplementary material |
| 31 |                                        |    |                                                                                                                                   |                               |
| 32 | Clarity of major themes                | 31 | Were major themes clearly presented in the findings?                                                                              | 10-18, supplementary material |
| 33 |                                        |    |                                                                                                                                   |                               |
| 34 | Clarity of minor themes                | 32 | Is there a description of diverse cases or discussion of minor themes?                                                            | 10-18                         |
| 35 |                                        |    |                                                                                                                                   |                               |
| 36 |                                        |    |                                                                                                                                   |                               |
| 37 |                                        |    |                                                                                                                                   |                               |
| 38 |                                        |    |                                                                                                                                   |                               |
| 39 |                                        |    |                                                                                                                                   |                               |
| 40 |                                        |    |                                                                                                                                   |                               |
| 41 |                                        |    |                                                                                                                                   |                               |
| 42 |                                        |    |                                                                                                                                   |                               |
| 43 |                                        |    |                                                                                                                                   |                               |
| 44 |                                        |    |                                                                                                                                   |                               |
| 45 |                                        |    |                                                                                                                                   |                               |
| 46 |                                        |    |                                                                                                                                   |                               |
| 47 |                                        |    |                                                                                                                                   |                               |
| 48 |                                        |    |                                                                                                                                   |                               |
| 49 |                                        |    |                                                                                                                                   |                               |
| 50 |                                        |    |                                                                                                                                   |                               |
| 51 |                                        |    |                                                                                                                                   |                               |
| 52 |                                        |    |                                                                                                                                   |                               |
| 53 |                                        |    |                                                                                                                                   |                               |
| 54 |                                        |    |                                                                                                                                   |                               |
| 55 |                                        |    |                                                                                                                                   |                               |
| 56 |                                        |    |                                                                                                                                   |                               |
| 57 |                                        |    |                                                                                                                                   |                               |
| 58 |                                        |    |                                                                                                                                   |                               |
| 59 |                                        |    |                                                                                                                                   |                               |
| 60 |                                        |    |                                                                                                                                   |                               |

**Supplemental file 2**

1  
2  
3  
4  
5  
6  
7 1. Patient / relative / carer topic guide.  
8  
9

10  
11  
12  
13 2. Initial thematic framework  
14  
15  
16  
17

18  
19 3. Table with summary of themes, sub-categories and verbatim quotes with participant numbers  
20  
21  
22  
23  
24  
25  
26  
27  
28  
29  
30  
31  
32  
33  
34  
35  
36  
37  
38  
39  
40  
41  
42  
43  
44  
45  
46  
47  
48  
49  
50  
51  
52  
53  
54  
55  
56  
57  
58  
59  
60

## Interview topic guide: Patient representative

### Introduction:

- We value your opinions/what you think about these questions; there's not necessarily a right or wrong answer; it's not a test.

### Examples of general probes that may be used

- Tell me more about that.
- Why do you think that?
- Have you got any examples?

If unable to answer open question:

- Some people have said this ... [e.g. a known barrier from the literature if not already mentioned – see below for specific examples] ...what do you think?

If participant unable to define early mobilisation:

- We are defining early mobilisation as something the patient does with 'their own muscle strength and control' including activities such as:
  - Moving in bed
  - Exercises
  - Sitting on the edge of the bed,
  - Standing
  - Marching on the spot,
  - Transferring from bed to chair
  - Walking...

...all whilst patients are on intensive care.

## Interview questions

### General questions:

1. Please tell me about your experience on the ICU.
  
2. Please tell me about physiotherapy and mobilisation (moving around and getting up and out of bed) on the ICU.
  - a. What you would think of as early mobilisation?
  - b. What early mobilisation did you do? How often did you do it?
  - c. How was it decided that it was the right time for you to start mobilising on the ICU?
  
3. Do you think that early mobilisation was carried out enough?

### Focused questions:

4. When you were asked if you wanted to mobilise, did you have any concerns over risks or problems that might occur?  
*Potential question-specific prompts: not being well enough; fall; lines and drains/breathing tube falling out.*

5. Was there anything that stopped or delayed you from mobilising on the ICU?

*Potential question-specific prompts: Feeling too unwell; lines and tubes; not enough staff.*

6. What kind of things stopped mobilisation from happening more often on the ICU you were on?

1  
2  
3  
4  
5  
6  
7  
8  
9  
10  
11  
12  
13  
14  
15  
16  
17  
18  
19  
20  
21  
22  
23  
24  
25  
26  
27  
28  
29  
30  
31  
32  
33  
34  
35  
36  
37  
38  
39  
40  
41  
42  
43  
44  
45  
46  
47  
48  
49  
50  
51  
52  
53  
54  
55  
56  
57  
58  
59  
60

*Potential question-specific prompts: Not a priority; team did not work together; team did not have enough teaching.*

7. Why do you think the staff on you ICU wanted you to mobilise and what do you think the benefits were?

*Example of potential question-specific prompts: Physical benefits; leave ICU sooner, prevent long-term complications.*

8. In your experience, what things helped you to mobilise on the ICU?

*Potential question-specific prompts: Different professions working together; feeling well.*

9. What kind of things do you think could be improved or changed to help mobilisation to happen more often on your ICU and to overcome some of the problems you mentioned earlier?

*Potential question-specific prompts: Better team communication; staff getting more teaching.*

10. This question will explore other areas that previous interviews have brought up as important: e.g. other people have mentioned this... what do you think?

11. Is there anything else you'd like to say about what stops early mobilisation on the ICU and what could make it happen more often?

## Initial thematic framework.

### **BARRIERS**

#### **1. Perceived risk of mobilising certain patients [SAFETY/RISK]**

- 1.1 Airway and attachments
- 1.2 Patient instability
- 1.3 Patient type
- 1.4 Patient cognitive state
- 1.5 Patient medical status
- 1.6 Clinicians' perception of readiness to mobilise
- 1.7 Other

#### **2 Patient's or their family member's reluctance for mobilisation**

- 2.1 Clinician opinion of patient's or their family member's reluctance for mobilisation
- 2.2 Patients not feeling ready or motivated for mobilisation
- 2.3 Poor communication from clinicians
- 2.4 Aspects of the ICU environment not promoting mobilisation to patients
- 2.5 Other

#### **3 Team working and unit culture/staff experience/ resources**

- 3.1 Culture/Lesser priority
- 3.2 Roles and responsibilities
- 3.3 Lack of leadership
- 3.4 Staff experience
- 3.5 Lack of knowledge
- 3.6 Lack of resources
- 3.7 Logistics/ Other interventions
- 3.8 Nurse environment e.g. HDU/toilet
- 3.9 Other

### **FACILITATORS**

#### **4 Practical changes to how mobilisation was carried out.**

- 4.1 Patient and family engagement
- 4.2 Mob treatment specific/functional rehabilitation
- 4.3 Use of protocols to facilitate clinical implementation of mobilisation
- 4.4 Patient opinion on how clinicians should communicate with them.
- 4.5 Specific patient motivators

1 4.6 Equipment/environment  
2

3 4.7 Other changes/optimal practice  
4  
5  
6

7 **5. Improvements in team working and culture/clinician specific**

8 5.1 Leadership

9 5.2 Team Communication

10 5.3 Experienced staff

11 5.4 Improved staffing/resources

12 5.5 Other team working

13 5.6 Prioritise

14 5.7 Education

15 5.8 Other culture change  
16  
17  
18  
19  
20

21 **6. Patient characteristics that made it easier to mobilise**

22 6.1 Pre-morbid/general characteristics status

23 6.2 Acute/admission-related status

24 6.3 Other  
25  
26  
27

28 **7. Risks, benefits and other**

29 7.1 Risks

30 7.2 Benefits

31 7.3 Other/irrelevant  
32  
33  
34  
35  
36  
37  
38  
39  
40  
41  
42  
43  
44  
45  
46  
47  
48  
49  
50  
51  
52  
53  
54  
55  
56  
57  
58  
59  
60

1  
2  
3  
4  
5  
6  
7  
8  
9  
10  
11  
12  
13  
14  
15  
16  
17  
18  
19  
20  
21  
22  
23  
24  
25  
26  
27  
28  
29  
30  
31  
32  
33  
34  
35  
36  
37  
38  
39  
40  
41  
42  
43  
44  
45  
46

| <b>Table: Summary of themes and sub-categories</b> |                                                               |                     |                                                                                                                                                                                                                                                                                                                                                                                                                  |
|----------------------------------------------------|---------------------------------------------------------------|---------------------|------------------------------------------------------------------------------------------------------------------------------------------------------------------------------------------------------------------------------------------------------------------------------------------------------------------------------------------------------------------------------------------------------------------|
| <b>Themes</b>                                      | <b>Sub-categories</b>                                         | <b>Quote number</b> | <b>Participant quote</b>                                                                                                                                                                                                                                                                                                                                                                                         |
| 1. Safety and physiological concerns               | 1.1 Airway, lines and attachments                             | 1                   | <i>"I can't think who, they said an intensive care patient looks like little spiders in a web, and I agree with it. Like literally they have got tubes and attachments out everywhere." (Therapist 1)</i>                                                                                                                                                                                                        |
|                                                    | 1.2 Particular patient groups                                 | 2                   | <i>"...the types of patients we have have multiple and complex injuries, they're not straightforward patients to mobilise anyway..." (Therapist 3)</i>                                                                                                                                                                                                                                                           |
|                                                    | 1.3 Physiological instability or dependence on organ support  | 3                   | <i>"...it's mainly blood pressure related for me, or their resp[iratory] rate. If I don't think they're going to tolerate mobilising, and if it's going to cause more harm than good." (Therapist 2)</i>                                                                                                                                                                                                         |
|                                                    |                                                               | 4                   | <i>"So anybody who's on an inotrope vasopressor is, as far as I'm concerned, not safe to be mobilised... they're more likely to have a postural hypertension that would result in injury to them." (Doctor 2)</i>                                                                                                                                                                                                |
|                                                    |                                                               | 5                   | <i>"...whilst in itself [vasoactive drugs are] often not a reason to prevent ongoing rehab especially in junior staff it's a significant source of anxiety of doubling or trebling the dose of a medicine to keep your blood pressure up, without some form of kind of very clear guidance and encouragement that this is okay and it will return to normal following [rehabilitation] treatment." (Nurse 5)</i> |
|                                                    | 1.4 Patient's ability to actively participate                 | 6                   | <i>"And after that incident I think that was the first time I actually cried, because it hit me that "Yes, the nurses are right, I am not able to just get up and move like I would if I had been healthy," you know, so that was very traumatic for me..." (Patient 11).</i>                                                                                                                                    |
|                                                    |                                                               | 7                   | <i>"I think I would have felt very vulnerable anyhow, [be]cause suddenly you are just weak as a baby." (Patient 7)</i>                                                                                                                                                                                                                                                                                           |
|                                                    |                                                               | 8                   | <i>"Their cognitive state is a massive thing as well. How alert are they if they've only just been woken up from sedation or if they've had a neurological event or, you know, whatever reason, that could affect their cognition." (Therapist 6)</i>                                                                                                                                                            |
|                                                    | 1.5 Clinician perception of readiness to begin rehabilitation | 9                   | <i>"...the perception, [clinicians] might think that, because this patient is dependent on a particular type of organ support, this patient is not suitable for mobilisation. So these boundaries and barriers needs to be broken." (Doctor 3)</i>                                                                                                                                                               |
|                                                    |                                                               | 10                  | <i>"I think it's probably the fear of the unwell patient, you know, we, they're in ITU therefore they must be the most unwell people in the hospital. And I think it's that kind of mentality and the fact we attach them to fifteen hundred things..." (Therapist 7)</i>                                                                                                                                        |



|                                                 |                                                         |                                                                                                                                                                                                                                                                                                                |                                                                                                                                                                                                                                                                                                                                                            |
|-------------------------------------------------|---------------------------------------------------------|----------------------------------------------------------------------------------------------------------------------------------------------------------------------------------------------------------------------------------------------------------------------------------------------------------------|------------------------------------------------------------------------------------------------------------------------------------------------------------------------------------------------------------------------------------------------------------------------------------------------------------------------------------------------------------|
|                                                 |                                                         | 11                                                                                                                                                                                                                                                                                                             | <i>"...happy to cause no harm, or kind of, and no perceived harm by not mobilising someone but actively getting up and causing harm is a, always going to be a significant anxiety for staff..." (Nurse 5)</i>                                                                                                                                             |
|                                                 |                                                         | 12                                                                                                                                                                                                                                                                                                             | <i>"We love keeping the numbers normal, we love the sense of security that we maintain as normal physiology as we can, so that is why, a junior nurse would be more worried if she gets any change in the patient's state after mobilisation..." (Doctor 1)</i>                                                                                            |
|                                                 |                                                         | 13                                                                                                                                                                                                                                                                                                             | <i>"...intensive care doctors and nurses may also be quite, well, I shouldn't say "quite" but there is a part in us that is controlling the situation and so, you know, trying to mobilise the patient may also be a bit of a paradigm shift in our own mind of, you know, this complete control over the situation and over this patient." (Doctor 4)</i> |
|                                                 |                                                         | 14                                                                                                                                                                                                                                                                                                             | <i>"...so we kind of reset our expectations about normality and that is doing some sort of exercise when they ambulate because it is – it is to a critically ill patient it is an exercise, that we may see some events happen and as long as it is the range of acceptance, we can just modify our targets, and continue to mobilise." (Doctor 1)</i>     |
| 2. Patient participation and engagement         | 2.1 Patient reluctance to participate in rehabilitation | 15                                                                                                                                                                                                                                                                                                             | <i>"...well I'm in ICU... you're having intensive care, don't rock the boat by making things worse by trying to get out of bed." (Patient 8)</i>                                                                                                                                                                                                           |
|                                                 |                                                         | 16                                                                                                                                                                                                                                                                                                             | <i>"...there were times when I simply didn't want to do it... Depression, ... lack of energy, lack of spirits really ..." (Patient 7)</i>                                                                                                                                                                                                                  |
|                                                 | 2.2 Communication between patients and clinicians       | 17                                                                                                                                                                                                                                                                                                             | <i>"I would say to any nurse or any staff working in ICU... keep up that reassurance with patients because it's quite a scary experience..." (Patient 8)</i>                                                                                                                                                                                               |
|                                                 |                                                         | 18                                                                                                                                                                                                                                                                                                             | <i>"[The consultant] pushed me beyond what I mentally thought was physically possible. I didn't believe that I could do that and of course, perhaps it's the nature of my personality, but I responded to that. Others may not have responded to that, I can't say." (Patient 3)</i>                                                                       |
|                                                 | 2.3 Patient engagement in planning rehabilitation       | 19                                                                                                                                                                                                                                                                                                             | <i>"So, alongside that, we've also made like goal setting sheets that can go up by the patient's bed, so then when they sit up, when they sit upright in bed, they can see them. I draw a smiley face when they've completed one..." (Therapist 2)</i>                                                                                                     |
| 2.4 Including activities meaningful to patients | 20                                                      | <i>"Looking at therapy in a slightly different way and finding an activity that's meaningful to [patients], whether that's personal care or leisure activities, and through that encouraging them to... engage in that activity and then helping them to see the therapeutic value of that." (Therapist 4)</i> |                                                                                                                                                                                                                                                                                                                                                            |
| 2.5 Identify key patient motivators             | 21                                                      | <i>"...if they can see what's in it for them, that they're gaining in dignity and all of that, they might cooperate more." (Relative 2)</i>                                                                                                                                                                    |                                                                                                                                                                                                                                                                                                                                                            |

|                                       |                                                   |                                                                                                                                                                                                                                                                                                                                                          |                                                                                                                                                                                                                                                                                                                                                                                                                        |
|---------------------------------------|---------------------------------------------------|----------------------------------------------------------------------------------------------------------------------------------------------------------------------------------------------------------------------------------------------------------------------------------------------------------------------------------------------------------|------------------------------------------------------------------------------------------------------------------------------------------------------------------------------------------------------------------------------------------------------------------------------------------------------------------------------------------------------------------------------------------------------------------------|
|                                       | 2.6 The role of family                            | 22                                                                                                                                                                                                                                                                                                                                                       | <i>"I remember the first time I took a few steps, the nurse said to me, "Well we'll do it with your husband," so my husband stood on one side and said, "We'll go for a walk with your husband," ... So it was most amazing feeling ever, you know? So everything, kind of in my head everything shut down; the nurse went away, the ward went away, it was just me and my husband going for a walk." (Patient 11)</i> |
| 3. Clinician experience and knowledge | 3.1 Amount of experience and support              | 23                                                                                                                                                                                                                                                                                                                                                       | <i>"I've had instances where it's mostly been junior people and it's terrifying. But for someone then to have a senior position helping you, that's so much better." (Nurse 2)</i>                                                                                                                                                                                                                                     |
|                                       | 3.2 Lack of training, knowledge and skills        | 24                                                                                                                                                                                                                                                                                                                                                       | <i>"It doesn't happen because... we are not aware enough yet how important it is, or how much difference it could make, so it's not embedded in our thinking and in our behaviour well..." (Doctor 4)</i>                                                                                                                                                                                                              |
|                                       | 3.3 Interdisciplinary team education and training | 25                                                                                                                                                                                                                                                                                                                                                       | <i>"The education as well is important because you need to get people to understand what they're doing and to value it, so that they do it with passion and with skill." (Doctor 1)</i>                                                                                                                                                                                                                                |
| 4. Teamwork                           | 4.1 Team culture and attitudes                    | 26                                                                                                                                                                                                                                                                                                                                                       | <i>"But a lot of it's just to do with the attitude of the individual staff member, how proactive they are and how much they believe in mobilisation as a kind of key thing" (Nurse 5)</i>                                                                                                                                                                                                                              |
|                                       |                                                   | 27                                                                                                                                                                                                                                                                                                                                                       | <i>"...I think the consultant's role is very important and it doesn't just include saying, "Mobilise the patient". It includes making sure that mobilisation happens and making sure that the team are, like every single member of the team is comfortable and understands the decision, and the risks related to it and understands that I am there to back them up if something happens." (Doctor 1)</i>            |
|                                       | 4.2 Perception of roles and responsibilities      | 28                                                                                                                                                                                                                                                                                                                                                       | <i>"I've found that it's taken a long time for me to be accepted and for them to actually accept my opinion might be right..." (Therapist 2)</i>                                                                                                                                                                                                                                                                       |
|                                       |                                                   | 29                                                                                                                                                                                                                                                                                                                                                       | <i>"I always felt like it was, it was very much seen it was the physio job to do anything related to moving the patient so even getting them out of bed." (Therapist 7)</i>                                                                                                                                                                                                                                            |
|                                       |                                                   | 30                                                                                                                                                                                                                                                                                                                                                       | <i>"...good teamwork is really helpful, and actually a really good symbiotic relationship between the nursing staff and the therapy staff is really key." (Therapist 4)</i>                                                                                                                                                                                                                                            |
|                                       | 4.3 Definition and delivery of rehabilitation     | 31                                                                                                                                                                                                                                                                                                                                                       | <i>"...mobilisation for me in ITU is hoisting somebody into a chair." (Nurse 4)</i>                                                                                                                                                                                                                                                                                                                                    |
| 32                                    |                                                   | <i>"...rehabilitation is not, you know, 20 minutes with the physio or the OT every day. Really good rehabilitation is a 24 hour approach, and that – part of that is positioning a patient in bed. Part of that is ensuring the patient gets the right nutrition as well as looking at the actual physical things that they're doing." (Therapist 4)</i> |                                                                                                                                                                                                                                                                                                                                                                                                                        |
| 33                                    |                                                   | <i>"...a different mentality within intensive care and to think, well actually, you know, we need to begin the rehab process all together from day one, and if a patient can be encouraged to do something they should be given the time and the opportunity to do that." (Therapist 4)</i>                                                              |                                                                                                                                                                                                                                                                                                                                                                                                                        |

|                                                           |                                   |    |                                                                                                                                                                                                                                                                                                                                                                            |
|-----------------------------------------------------------|-----------------------------------|----|----------------------------------------------------------------------------------------------------------------------------------------------------------------------------------------------------------------------------------------------------------------------------------------------------------------------------------------------------------------------------|
|                                                           | 4.4 Staffing and logistics        | 34 | <i>"...you start breaks at 9.30, 10.00. You finish the breaks about 12.00,1.00, so then it's not until the afternoon that people are free to help." (Nurse 2)</i>                                                                                                                                                                                                          |
| 5. Equipment and environment                              | 5.1 Rehabilitation equipment      | 35 | <i>"...equipment wise. You know, it's the age old problem isn't it, more of it, better ways to fix it, more money, so we've got the equipment, you know, got backup hoists." (Therapist 7)</i>                                                                                                                                                                             |
|                                                           | 5.2 ICU environment               | 36 | <i>"there's just something about the environment which makes you think that you need to stay in the bed and that you shouldn't be moving around... whereas on a general ward, you don't want to be in the bed, you want to get out." (Patient 8)</i>                                                                                                                       |
|                                                           |                                   | 37 | <i>"...you can see some bright lights and monitors, you can hear monitors going off, but you don't have the, "Crash, bang, wallops!" that you get in a general ward... but it's a capsule and a bubble, it's a weird feeling... "People think it's like being in a spaceship" and I thought, "That's such a good description" and that's how it did feel." (Patient 8)</i> |
| 6. Risks and benefits of rehabilitation on intensive care | 6.1 Clinician perception of risks | 38 | <i>"Falls, removal of lines and tubes and then causing bleeding, vasovagal episodes, it's actually a risky thing to mobilise an ITU patient, anything can go wrong..." (Nurse 3)</i>                                                                                                                                                                                       |
|                                                           |                                   | 39 | <i>"I like mobilising patients. The more attachments the better... Because I like the challenge!" (Therapist 2)</i>                                                                                                                                                                                                                                                        |
|                                                           | 6.2 Patient perception of risks   | 40 | <i>"I never felt scared, I felt that the physiotherapist that was orchestrating the movement was sort of holding on to me to begin with and I never felt I was going to fall down..." (Patient 1)</i>                                                                                                                                                                      |
|                                                           | 6.3 Physical benefits             | 41 | <i>"It might help their movement and I feel the more they mobilise the more their muscles are good. The more you make them sit out of the bed and stand they can stand on their feet better." (Nurse 1)</i>                                                                                                                                                                |
|                                                           | 6.4 Psychological benefits        | 42 | <i>"...the important thing is you sense that you're not just lying there waiting to die. ...so you are... you are... coming back to being a human being that wants to live." (Patient 7)</i>                                                                                                                                                                               |
