# Supplementary material for: Clinician and patient perspectives on the barriers and facilitators to physical rehabilitation in intensive care: a qualitative interview study
Source: PubMed Central journal article supplement (PMC10632869; doi:10.1136/bmjopen-2023-073061), 2023-11-08
Supplement: bmjopen-2023-073061supp001.pdf [file bmjopen-2023-073061supp001.pdf]

### Consolidated criteria for reporting qualitative research checklist

Adapted from: TONG, A., SAINSBURY, P. & CRAIG, J. 2007. Consolidated criteria for reporting qualitative research (COREQ): a 32-item checklist for interviews and focus groups. *Int J Qual Health Care*, 19, 349-57.

| Topic                                          | Item no. | Guide questions/ descriptions                                                                                                                            | Reported on page no. |
|------------------------------------------------|----------|----------------------------------------------------------------------------------------------------------------------------------------------------------|----------------------|
| <b>Domain 1: Research team and reflexivity</b> |          |                                                                                                                                                          |                      |
| Personal Characteristics                       |          |                                                                                                                                                          |                      |
| Interviewer/facilitator                        | 1        | Which author/s conducted the interview or focus group?                                                                                                   | 6                    |
| Credentials                                    | 2        | What were the researcher's credentials? E.g. PhD, MD                                                                                                     | 6                    |
| Occupation                                     | 3        | What was their occupation at the time of the study?                                                                                                      | 6-7                  |
| Gender                                         | 4        | Was the researcher male or female?                                                                                                                       | 6                    |
| Experience and training                        | 5        | What experience or training did the researcher have?                                                                                                     | 6-7                  |
| Relationship with participants                 |          |                                                                                                                                                          |                      |
| Relationship established                       | 6        | Was a relationship established prior to study commencement?                                                                                              | 6-7                  |
| Participant knowledge of the interviewer       | 7        | What did the participants know about the researcher? e.g. personal goals, reasons for doing the research                                                 | 6-7                  |
| Interviewer characteristics                    | 8        | What characteristics were reported about the interviewer/facilitator? e.g. Bias, assumptions, reasons and interests in the research topic                | 6-7                  |
| <b>Domain 2: study design</b>                  |          |                                                                                                                                                          |                      |
| Theoretical framework                          |          |                                                                                                                                                          |                      |
| Methodological orientation and Theory          | 9        | What methodological orientation was stated to underpin the study? e.g. grounded theory, discourse analysis, ethnography, phenomenology, content analysis | 4                    |
| Participant selection                          |          |                                                                                                                                                          |                      |
| Sampling                                       | 10       | How were participants selected? e.g. purposive, convenience, consecutive, snowball                                                                       | 5                    |
| Method of approach                             | 11       | How were participants approached? e.g. face-to-face, telephone, mail, email                                                                              | 5                    |
| Sample size                                    | 12       | How many participants were in the study?                                                                                                                 | 8                    |
| Non-participation                              | 13       | How many people refused to participate or dropped out? Reasons?                                                                                          | 8                    |
| Setting                                        |          |                                                                                                                                                          |                      |
| Setting of data collection                     | 14       | Where was the data collected? e.g. home, clinic, workplace                                                                                               | 6                    |
| Presence of non-participants                   | 15       | Was anyone else present besides the participants and researchers?                                                                                        | 6                    |
| Description of sample                          | 16       | What are the important characteristics of the sample? e.g. demographic data, date                                                                        | 9-10                 |
| Data collection                                |          |                                                                                                                                                          |                      |

|                                        |    |                                                                                                                                   |                               |
|----------------------------------------|----|-----------------------------------------------------------------------------------------------------------------------------------|-------------------------------|
| Interview guide                        | 17 | Were questions, prompts, guides provided by the authors? Was it pilot tested?                                                     | 6                             |
| Repeat interviews                      | 18 | Were repeat interviews carried out? If yes, how many?                                                                             | 6                             |
| Audio/visual recording                 | 19 | Did the research use audio or visual recording to collect the data?                                                               | 6                             |
| Field notes                            | 20 | Were field notes made during and/or after the interview or focus group?                                                           | 7                             |
| Duration                               | 21 | What was the duration of the interviews or focus group?                                                                           | 8                             |
| Data saturation                        | 22 | Was data saturation discussed?                                                                                                    | 5-6                           |
| Transcripts returned                   | 23 | Were transcripts returned to participants for comment and/or correction?                                                          | 6                             |
| <b>Domain 3: analysis and findings</b> |    |                                                                                                                                   |                               |
| Data analysis                          |    |                                                                                                                                   |                               |
| Number of data coders                  | 24 | How many data coders coded the data?                                                                                              | 7                             |
| Description of the coding tree         | 25 | Did authors provide a description of the coding tree?                                                                             | Supplementary material        |
| Derivation of themes                   | 26 | Were themes identified in advance or derived from the data?                                                                       | 7                             |
| Software                               | 27 | What software, if applicable, was used to manage the data?                                                                        | 7                             |
| Participant checking                   | 28 | Did participants provide feedback on the findings?                                                                                | 5-6                           |
| Reporting                              |    |                                                                                                                                   |                               |
| Quotations presented                   | 29 | Were participant quotations presented to illustrate the themes / findings? Was each quotation identified? e.g. participant number | 11-17, supplementary material |
| Data and findings consistent           | 30 | Was there consistency between the data presented and the findings?                                                                | 10-18, supplementary material |
| Clarity of major themes                | 31 | Were major themes clearly presented in the findings?                                                                              | 10-18, supplementary material |
| Clarity of minor themes                | 32 | Is there a description of diverse cases or discussion of minor themes?                                                            | 10-18                         |
